# Supplementary material for: Drought Stress Triggers Shifts in the Root Microbial Community and Alters Functional Categories in the Microbial Gene Pool
Source: Front Microbiol. 2021 Oct 21;12:744897. doi: 10.3389/fmicb.2021.744897 (PMC8566882; doi:10.3389/fmicb.2021.744897)
Supplement: Supplementary file 2 [file Table_2.XLSX]

## Sheet: legends
Data S1.	Functional categories influenced by drought in the rhizosphere, as annotated using the EggNOG database.
Data S2	Differential abundance of bacterial taxa between groups.

## Sheet: Data S1 DB VS CB
BD vc BC
Taxa	Fold change	p value
f__Bacillaceae;g__Bacillus	7.59848	0.00428171
f__Lachnospiraceae;g__Coprococcus	7.07923	0.00496599
f__Aerococcaceae;g__Globicatella	5.956	0.00797141
f__Veillonellaceae;g__Caecibacter	5.956	0.00792812
f__Pasteurellaceae;g__Chelonobacter	3.4788	8.68347e-05
f__Beutenbergiaceae;g__Serinibacter	2.51117	0.00806523
f__Halobacteroidaceae;g__Halonatronum	2.42401	0.0072573
f__Bacillaceae;g__Alteribacillus	2.26982	0.00321168
f__Enterobacteriaceae;g__Pluralibacter	2.26213	0.00316089
f__Natrialbaceae;g__Halovivax	2.10889	0.00921008
f__Bacillaceae;g__Halobacillus	2.08036	0.00263003
f__Opitutaceae;g__Lacunisphaera	1.9302	0.00707328
f__Paenibacillaceae;g__Brevibacillus	1.92295	0.00445552
f__Nocardioidaceae;g__Pimelobacter	1.67129	0.00957903
f__Streptomycetaceae;g__Streptomyces	1.66584	0.00181673
f__Cellvibrionaceae;g__Agaribacterium	1.53795	0.00363879
f__Cellvibrionaceae;g__Marinagarivorans	1.49745	0.0097726
f__Acidimicrobiaceae;g__Ferrithrix	1.49316	0.00835028
f__Paenibacillaceae;g__Aneurinibacillus	1.48341	0.000329732
f__Nocardioidaceae;g__Marmoricola	1.43109	0.00470016
f__Sporomusaceae;g__Pelosinus	1.42755	0.000236559
f__Acetobacteraceae;g__Acidomonas	1.39239	0.00193708
f__Sporomusaceae;g__Anaerosporomusa	1.38411	0.00454011
f__Thermoleophilaceae;g__Thermoleophilum	1.38357	0.00266203
f__Gallionellaceae;g__Sulfuricella	1.34047	0.00734807
f__Syntrophorhabdaceae;g__Syntrophorhabdus	1.32174	0.00100956
f__Thermodesulfobacteriaceae;g__Thermosulfurimonas	1.27559	0.00383274
f__Chromobacteriaceae;g__Chitiniphilus	1.21551	0.000125099
f__Rhodospirillaceae;g__Tistrella	0.904427	0.00853206
f__Xanthobacteraceae;g__Azorhizobium	0.876545	0.00222915
f__Chelatococcaceae;g__Chelatococcus	0.863955	0.00938245
f__Rhodobacteraceae;g__Albidovulum	0.862027	0.0042923
f__Aeromonadaceae;g__Aeromonas	0.852263	0.00164893
f__Halomonadaceae;g__Aidingimonas	0.820968	0.00752901
f__Pseudoalteromonadaceae;g__Pseudoalteromonas	0.819805	0.0013409
f__Sneathiellaceae;g__Oceanibacterium	0.816799	0.00531183
f__Leptospiraceae;g__Leptospira	0.808715	0.0035006
f__Ectothiorhodospiraceae;g__Nitrococcus	0.807196	0.00246396
f__Chamaesiphonaceae;g__Chamaesiphon	0.802778	0.0079538
f__Scytonemataceae;g__Scytonema	0.802441	0.0066364
f__Phyllobacteriaceae;g__Pseudaminobacter	0.802126	0.00355914
f__Paenibacillaceae;g__Aneurinibacillus	0.798102	0.000923138
f__Desulfobacteraceae;g__Desulfobacter	0.793647	0.00905695
f__Chroococcidiopsidaceae;g__Aliterella	0.789419	0.00209359
f__Phyllobacteriaceae;g__Nitratireductor	0.776454	0.00407328
f__Rhodobacteraceae;g__Roseibium	0.76933	0.00673352
f__Isosphaeraceae;g__Isosphaera	0.76839	0.00149184
f__Unclassified;g__Mongoliimonas	0.765526	0.00762286
f__Rhodobacteraceae;g__Yangia	0.764246	0.000843489
f__Planctomycetaceae;g__Thermogutta	0.762342	0.00689845
f__Rhodobacteraceae;g__Maliponia	0.761909	0.00989247
f__Syntrophomonadaceae;g__Syntrophothermus	0.756288	0.00547431
f__Campylobacteraceae;g__Arcobacter	0.752752	0.00619568
f__Bacillaceae;g__Alteribacillus	0.752646	0.00289873
f__Rhodobacteraceae;g__Pseudooceanicola	0.748534	0.00803067
f__Haloferacaceae;g__Haloferax	0.747966	0.00384554
f__Phyllobacteriaceae;g__Chelativorans	0.744575	0.00104938
f__Rhodobacteraceae;g__Pseudovibrio	0.740468	0.00753644
f__Bernardetiaceae;g__Bernardetia	0.738826	0.00982645
f__Unclassified;g__Candidatus Puniceispirillum	0.735974	0.00925894
f__Flavobacteriaceae;g__Formosa	0.732884	0.00727559
f__Unclassified;g__Methyloligella	0.726356	0.00745958
f__Chromobacteriaceae;g__Aquaspirillum	0.717449	0.00157583
f__Thermoactinomycetaceae;g__Marininema	0.714246	0.00897799
f__Thermoactinomycetaceae;g__Seinonella	0.710221	0.000154122
f__Rhodobacteraceae;g__Salinihabitans	0.705525	0.0096129
f__Oscillatoriaceae;g__Moorea	0.702759	0.00181999
f__Planctomycetaceae;g__Mariniblastus	0.695853	0.00997212
f__Planctomycetaceae;g__Blastopirellula	0.69155	0.00857188
f__Persicobacteraceae;g__Persicobacter	0.680026	0.00953574
f__Rhodobacteraceae;g__Puniceibacterium	0.679238	0.00425249
f__Rhodobacteraceae;g__Pseudodonghicola	0.6792	0.00153141
f__Planctomycetaceae;g__Planctomicrobium	0.677584	0.00323775
f__Intrasporangiaceae;g__Terracoccus	0.672496	0.00576862
f__Cohaesibacteraceae;g__Cohaesibacter	0.663564	0.00237754
f__Rhodobacteraceae;g__Confluentimicrobium	0.659847	0.00490004
f__Unclassified;g__Candidatus Kryptonium	0.6578	0.00140747
f__Microcoleaceae;g__Planktothricoides	0.65634	0.00359896
f__Unclassified;g__Micavibrio	0.649283	0.00688595
f__Nitrospiraceae;g__Nitrospira	0.636214	0.00287176
f__Rhodobacteraceae;g__Roseicitreum	0.622932	0.00398686
f__Sinobacteraceae;g__Steroidobacter	0.613742	0.0045834
f__Ophiocordycipitaceae;g__Ophiocordyceps	0.612679	0.00709764
f__Chromobacteriaceae;g__Microvirgula	0.606845	0.005998
f__Unclassified;g__Thermoanaerobaculum	0.603788	0.000648347
f__Bacillaceae;g__Geobacillus	0.595194	0.0099323
f__Actinomycetaceae;g__Actinotignum	1.59211	0.00484714
f__Saprospiraceae;g__Saprospira	0.589418	0.00957308
f__Unclassified;g__Candidatus Nitrosotalea	0.58466	0.00245751
f__Silvanigrellaceae;g__Silvanigrella	0.510981	0.00169222
f__Synergistaceae;g__Thermanaerovibrio	0.500605	0.00555742
f__Methanomicrobiaceae;g__Methanoplanus	0.461901	0.00448259
f__Aphanothecaceae;g__Rubidibacter	0.4404	0.00869136
f__Methylobacteriaceae;g__Neomegalonema	0.433385	0.00830904
f__Flavobacteriaceae;g__Arenitalea	0.424383	0.00593685
f__Ruminococcaceae;g__Hydrogenoanaerobacterium	0.42407	0.000408563
f__Lachnospiraceae;g__Lachnotalea	0.420435	0.0062732
f__Polyangiaceae;g__Jahnella	0.37874	0.00985265
f__Diatrypaceae;g__Eutypa	0.378291	0.00191076
f__Enterobacteriaceae;g__Raoultella	0.342567	0.00210604
f__Halorubraceae;g__Candidatus Halobonum	0.33302	0.00659658
f__Serendipitaceae;g__Serendipita	0.315624	0.008818
f__Myoviridae;g__Se1virus	0.301392	0.00460424
f__Methylophilaceae;g__Methylovorus	0.285276	0.00145075
f__Methylophilaceae;g__Candidatus Methylopumilus	0.285067	0.00101708
f__Acetobacteraceae;g__Saccharibacter	0.193396	0.00543449
f__Arthrodermataceae;g__Trichophyton	0.113076	0.00262265
f__Carnobacteriaceae;g__Atopococcus	0.0598996	0.00929908
f__Coniophoraceae;g__Coniophora	0	0.00885425
f__Pasteurellaceae;g__Histophilus	0	0.000883313
f__Bacillaceae;g__Halalkalibacillus		0.00777071
CD vc CC
DD VS DC

## Sheet: Data S1 DC VS CC
CD vc CC
f__Aerococcaceae;g__Globicatella	5.956	0.00797141
f__Streptomycetaceae;g__Streptomyces	5.956	0.00792812
f__Paenibacillaceae;g__Brevibacillus	1.92295	0.00445552
f__Nocardioidaceae;g__Pimelobacter	1.67129	0.00957903
f__Paenibacillaceae;g__Aneurinibacillus	1.6578	0.00140747
f__Acidimicrobiaceae;g__Ferrithrix	1.49316	0.00835028
f__Actinomycetaceae;g__Actinotignum	1.43109	0.00470016
f__Sporomusaceae;g__Anaerosporomusa	1.38411	0.00454011
f__Thermoleophilaceae;g__Thermoleophilum	1.38357	0.00266203
f__Chromobacteriaceae;g__Chitiniphilus	1.21551	0.000125099
f__Xanthobacteraceae;g__Azorhizobium	0.876545	0.00222915
f__Chelatococcaceae;g__Chelatococcus	0.863955	0.00938245
f__Rhodobacteraceae;g__Albidovulum	0.862027	0.0042923
f__Aeromonadaceae;g__Aeromonas	0.852263	0.00164893
f__Rhodobacteraceae;g__Roseibium	0.76933	0.00673352
f__Bacillaceae;g__Bacillus	1.75265	0.00289873
f__Bernardetiaceae;g__Bernardetia	0.738826	0.00982645
f__Unclassified;g__Candidatus Puniceispirillum	0.735974	0.00925894
f__Persicobacteraceae;g__Persicobacter	0.680026	0.00953574
f__Sinobacteraceae;g__Steroidobacter	0.613742	0.0045834
f__Unclassified;g__Candidatus Nitrosotalea	0.58466	0.00245751
f__Silvanigrellaceae;g__Silvanigrella	0.510981	0.00169222
f__Flavobacteriaceae;g__Arenitalea	0.424383	0.00593685
f__Methylophilaceae;g__Methylovorus	0.285276	0.00145075
f__Methylophilaceae;g__Candidatus Methylopumilus	0.285067	0.00101708
f__Coniophoraceae;g__Coniophora	0	0.00885425

## Sheet:  Data S1 DD VS CD
DD VS DC
f__Streptomycetaceae;g__Streptomyces	10.4138	0.00312107
f__Enterobacteriaceae;g__Pluralibacter	2.26213	0.00316089
f__Bacillaceae;g__Alteribacillus	2.08036	0.00263003
f__Opitutaceae;g__Lacunisphaera	1.9302	0.00707328
f__Paenibacillaceae;g__Aneurinibacillus	1.73288	0.00727559
f__Cellvibrionaceae;g__Agaribacterium	1.53795	0.00363879
f__Cellvibrionaceae;g__Marinagarivorans	1.49745	0.0097726
f__Actinomycetaceae;g__Actinotignum	1.4404	0.00869136
f__Sporomusaceae;g__Pelosinus	1.42755	0.000236559
f__Acetobacteraceae;g__Acidomonas	1.39239	0.00193708
f__Gallionellaceae;g__Sulfuricella	1.34047	0.00734807
f__Syntrophorhabdaceae;g__Syntrophorhabdus	1.32174	0.00100956
f__Thermodesulfobacteriaceae;g__Thermosulfurimonas	1.27559	0.00383274
f__Rhodospirillaceae;g__Tistrella	0.904427	0.00853206
f__Pseudoalteromonadaceae;g__Pseudoalteromonas	0.819805	0.0013409
f__Sneathiellaceae;g__Oceanibacterium	0.816799	0.00531183
f__Ectothiorhodospiraceae;g__Nitrococcus	0.807196	0.00246396
f__Chamaesiphonaceae;g__Chamaesiphon	0.802778	0.0079538
f__Scytonemataceae;g__Scytonema	0.802441	0.0066364
f__Phyllobacteriaceae;g__Pseudaminobacter	0.802126	0.00355914
f__Paenibacillaceae;g__Aneurinibacillus	0.798102	0.000923138
f__Desulfobacteraceae;g__Desulfobacter	0.793647	0.00905695
f__Chroococcidiopsidaceae;g__Aliterella	0.789419	0.00209359
f__Phyllobacteriaceae;g__Nitratireductor	0.776454	0.00407328
f__Isosphaeraceae;g__Isosphaera	0.76839	0.00149184
f__Unclassified;g__Mongoliimonas	0.765526	0.00762286
f__Rhodobacteraceae;g__Yangia	0.764246	0.000843489
f__Planctomycetaceae;g__Thermogutta	0.762342	0.00689845
f__Rhodobacteraceae;g__Maliponia	0.761909	0.00989247
f__Syntrophomonadaceae;g__Syntrophothermus	0.756288	0.00547431
f__Rhodobacteraceae;g__Pseudooceanicola	0.748534	0.00803067
f__Phyllobacteriaceae;g__Chelativorans	0.744575	0.00104938
f__Rhodobacteraceae;g__Pseudovibrio	0.740468	0.00753644
f__Unclassified;g__Methyloligella	0.726356	0.00745958
f__Thermoactinomycetaceae;g__Seinonella	0.710221	0.000154122
f__Rhodobacteraceae;g__Salinihabitans	0.705525	0.0096129
f__Oscillatoriaceae;g__Moorea	0.702759	0.00181999
f__Planctomycetaceae;g__Mariniblastus	0.695853	0.00997212
f__Planctomycetaceae;g__Blastopirellula	0.69155	0.00857188
f__Rhodobacteraceae;g__Puniceibacterium	0.679238	0.00425249
f__Planctomycetaceae;g__Planctomicrobium	0.677584	0.00323775
f__Intrasporangiaceae;g__Terracoccus	0.672496	0.00576862
f__Cohaesibacteraceae;g__Cohaesibacter	0.663564	0.00237754
f__Rhodobacteraceae;g__Confluentimicrobium	0.659847	0.00490004
f__Microcoleaceae;g__Planktothricoides	0.65634	0.00359896
f__Nitrospiraceae;g__Nitrospira	0.636214	0.00287176
f__Rhodobacteraceae;g__Roseicitreum	0.622932	0.00398686
f__Unclassified;g__Thermoanaerobaculum	0.603788	0.000648347
f__Bacillaceae;g__Bacillus	1.59519	0.0099323
f__Saprospiraceae;g__Saprospira	0.589418	0.00957308
f__Methylobacteriaceae;g__Neomegalonema	0.433385	0.00830904
f__Lachnospiraceae;g__Lachnotalea	0.420435	0.0062732
f__Polyangiaceae;g__Jahnella	0.37874	0.00985265
f__Halorubraceae;g__Candidatus Halobonum	0.33302	0.00659658
f__Serendipitaceae;g__Serendipita	0.315624	0.008818
f__Acetobacteraceae;g__Saccharibacter	0.193396	0.00543449
f__Carnobacteriaceae;g__Atopococcus	0.0598996	0.00929908
f__Pasteurellaceae;g__Histophilus	0	0.000883313

## Sheet: Data S2 DB VS CB
EggNOG category	mean(CB)	mean(DB)	P value
CRISPR-associated RAMP protein, Csm5 family	2.58e-06	1.57e-06	0
subunit l	0.000681473	0.000733977	0.000185226
SMI1 _ KNR4 family (SUKH-1)	2.34e-06	1.09e-06	0.000218954
sporulation protein ytfj	4.84e-07	2.31e-07	0.000263629
Nucleotidyl transferase	9.83e-06	6.12e-06	0.00035298
tnsa endonuclease	2.06e-06	4.92e-07	0.00038527
Catalyzes the last two steps in the bios(...)_1068	0.000378217	0.000396012	0.000838328
spore coat U domain-containing protein	1.57e-05	1.39e-05	0.000891739
cytochrome C oxidase subunit IV	3.51e-06	6.09e-06	0.00117151
Chromatin associated protein KTI12	4.31e-08	6.54e-07	0.00128984
Pfam:Phage_integr_N	0	7.91e-08	0.00135552
Salt-stress induced outer membrane protein	5.91e-07	2.74e-07	0.00159372
SnRK1-interacting protein 1	6.46e-08	0	0.00169147
ribosome biogenesis, protein	6.39e-08	0	0.00170364
adventurous gliding motility protein AgmO	4.1e-07	1.89e-08	0.0017158
Transposition helper protein	6.04e-07	9.16e-08	0.00178237
PAP2 superfamily protein	8.78e-06	4.64e-06	0.00206856
type IIi	3.53e-05	2.86e-05	0.00245792
Iron-sulfur binding protein	5.41e-07	1.75e-06	0.00271989
Hydrid cluster protein-associated redox (...)_2641	7.38e-07	1.5e-07	0.00295787
Tellurite resistance protein TerB	5.64e-05	6.36e-05	0.00303196
peptidase, M20	1.23e-06	5.86e-07	0.00304412
membrane-associated protein	4.35e-07	1.58e-06	0.00316488
histidine ammonia-lyase	0.000166012	0.000178397	0.00336039
host-nuclease inhibitor protein	4.24e-07	6.57e-08	0.00338262
GDP-mannose 4,6-dehydratase	0.00023088	0.000222314	0.00343802
Lysozyme inhibitor	4.93e-07	1.63e-06	0.003535
Protein of unknown function (DUF3299)	3.35e-06	1.94e-06	0.00360057
BolA family	3.54e-05	4.05e-05	0.00379509
Glycosyl hydrolase family 1	2.83e-06	2.25e-06	0.00382793
2-methyleneglutarate mutase	2.39e-06	1.5e-06	0.00393498
Protein of unknown function (DUF3275)	9.76e-07	5.42e-07	0.00403472
Tol-Pal system protein	1.01e-06	2.98e-07	0.00424726
Uncharacterized protein conserved in bacteria (DUF2218)	6.72e-06	1.08e-05	0.00432467
outer membrane autotransporter barrel domain	3.11e-06	4.73e-06	0.00454827
Protein of unknown function (DUF2380)	5.84e-06	7.82e-06	0.00462402
PBS lyase HEAT-like repeat	5.65e-06	3.93e-06	0.00471237
phosphonate ABC transporter, periplasmic(...)_8575	7.42e-05	8.65e-05	0.00476755
Rieske 2fe-2s domain protein	1.59e-05	1.28e-05	0.00483401
Polyamine oxidase	0	1.05e-07	0.004953
Activates expression of the rhaSR operon(...)_383	3.72e-06	2.46e-06	0.00512994
Protein of unknown function, DUF608	3.82e-06	5.35e-06	0.00537709
metallo-sulfur cluster assembly	0.000138461	0.000149765	0.00539954
Lipopolysaccharide transport periplasmic protein LptA	4.27e-07	8.65e-07	0.00566737
Pbs lyase	9.8e-07	3.2e-07	0.00582506
conserved coiled coil protein	2.84e-07	1.19e-06	0.00601228
Death-On-Curing Family	4.72e-05	3.91e-05	0.00613922
Hydrolyzes D-tyrosyl-tRNA(Tyr) into D-ty(...)_2655	9.8e-05	8.57e-05	0.00633529
Catalyzes a reversible aldol reaction be(...)_954	0.000121084	0.000127062	0.00635829
Protein of unknown function (DUF2933)	3.4e-06	5.32e-06	0.00643282
Malonyl coA-acyl carrier protein transacylase	0.000210125	0.000222659	0.00647705
ISBm1, transposase orfA	1.16e-05	1.37e-05	0.0066144
Protein of unknown function (DUF3343)	0	2.64e-07	0.00675561
pectate lyase activity	1.16e-05	8.83e-06	0.00679996
Catalyzes the reversible oxidation of ma(...)_1101	0.000345815	0.000383749	0.00683247
Sulfate ABC transporter, periplasmic sulfate-binding protein	2.68e-06	5.11e-06	0.00700409
Protein of unknown function (DUF2281)	1.83e-06	7.49e-07	0.00703782
Toxic anion resistance	2.82e-05	3.85e-05	0.00714553
Catalyzes the phosphorylation of ribose (...)_1082	1.01e-05	1.32e-05	0.00722105
conjugation	0.0003797	0.000428923	0.00728807
Membrane bOund o-acyl transferase mboat family protein	0.000173108	0.000161838	0.00732368
Protein of unknown function (DUF523)	5.65e-07	1.33e-06	0.00737941
lipoprotein	2.71e-06	3.59e-06	0.00742431
nicotinate-nucleotide diphosphorylase (c(...)_8245	0.000152912	0.000167688	0.0075956
Cytochrome p450	0.000444333	0.000497379	0.00764835
feS assembly ATPase SufC	0.000241551	0.000256574	0.0077576
transcription, DNA-dependent	0.000195515	0.000216744	0.00783523
SURF1 family	4.44e-06	7.38e-06	0.00787913
Head-tail adaptor	4.08e-08	4.92e-07	0.00798651
Predicted small integral membrane protein (DUF2160)	4.71e-07	3.11e-08	0.00808404
ABC-type nitrate sulfonate bicarbonate t(...)_235	4.2e-07	2.11e-07	0.00812938
Xylose isomerase	9.77e-05	0.00011058	0.00827414
(NAD(P)H dehydrogenase) (Quinone)	8.38e-05	9.63e-05	0.00849364
Putrescine ABC transporter, permease	4.92e-06	8.64e-06	0.00853699
PINc	6.39e-06	4.68e-06	0.00895842
Dicarboxylate transport	2.31e-05	3e-05	0.00921453
Isocitrate lyase	0.000129646	0.000159019	0.00938616
restriction modification system DNA specificity	1.47e-06	3.23e-07	0.00942873
Asp Glu hydantoin racemase	6.67e-05	7.36e-05	0.00957956
Phage portal protein lambda family	8.51e-06	7.09e-06	0.00969999
dinb family	0.000159062	0.000138746	0.0097858
PALM domain HD hydrolase domain and	1.69e-06	7.45e-07	0.0102174
type VI secretion system effector, hcp1 family	2.85e-05	2.46e-05	0.0102975
chorismate mutase	1.47e-05	1.06e-05	0.0107401
Hemin uptake protein	7.48e-07	1.88e-06	0.0107839
ATP-dependent endonuclease family protein	2.65e-06	1.36e-06	0.0108602
tetracycline regulation of excision, rtec	3.96e-07	9.89e-07	0.0110232
Ferric uptake regulator, Fur family	0.000322028	0.000350307	0.0110565
Amp-dependent synthetase and ligase	0.00284786	0.00315881	0.0111334
Phage cell wall peptidase, NlpC P60	2.26e-07	3.74e-08	0.0111566
type II secretion system protein N	1.69e-06	3.06e-06	0.0111788
Addiction module component, TIGR02574 family	5.93e-06	3.42e-06	0.0112777
containing PIN domain	1.53e-07	6.24e-07	0.0114066
argininosuccinate lyase	0.000341534	0.000379256	0.0115724
Putative addiction module component	1.4e-05	1.04e-05	0.0116069
Outer membrane fimbrial	3.03e-07	5.3e-07	0.0116413
Protein modifier that is covalently atta(...)_4370	3.04e-07	1.18e-06	0.0118549
This enzyme is involved in nucleotide me(...)_5882	0.000146379	0.000154389	0.0118998
Uncharacterized protein conserved in bacteria (DUF2326)	2.14e-06	1.43e-06	0.0119541
Protein of unknown function (DUF1018)	1.38e-06	2.09e-07	0.0120414
N-6 DNA Methylase	8.78e-06	5.65e-06	0.012084
PUA domain containing protein	1.46e-07	5.82e-07	0.0121854
UPF0237 protein	1.07e-05	1.26e-05	0.0122653
Urocanate hydratase	0.000205608	0.000227498	0.0123208
Spermidine putrescine ABC transporter, p(...)_5593	6.17e-06	9.11e-06	0.012333
IS4 family Transposase	5.8e-06	2.9e-06	0.0123552
Nuclear protein set	9.58e-06	5.41e-06	0.012452
peptidase C1A papain	2.34e-05	2.66e-05	0.012496
Catalyzes the oxidative cleavage of the (...)_1076	9.7e-05	0.000105328	0.0125184
Conserved protein CoxF	4.74e-06	7.87e-06	0.012586
Septum formation initiator family protein	8.38e-07	1.39e-06	0.0127656
Fe-S assembly protein	0.000641021	0.000695405	0.0128101
rRNA methylase	3.17e-07	0	0.0128331
Major Facilitator Superfamily	0.000202033	0.000216682	0.0128882
Catalyzes the reversible formation of ac(...)_1097	0.000211128	0.000227036	0.0129218
lvivd repeat-containing protein	1.2e-05	1.53e-05	0.0129541
Protein of unknown function (DUF1624)	4.11e-06	1.69e-06	0.0129888
O-acyltransferase (WSD1-like)	3.71e-07	1e-06	0.0130649
C_GCAxxG_C_C family	2.9e-06	1.38e-06	0.0131197
cold shock domain family protein	0	1.48e-07	0.0132835
cell filamentation protein	1.55e-05	1.75e-05	0.0134554
Isoflavone reductase	1.2e-06	8.03e-07	0.0134894
Aaa atpase	0.000620199	0.00067913	0.0136402
dolichyl-phosphate-mannose-protein mannosyltransferase	2.18e-06	3.56e-06	0.0139102
Oligopeptide dipeptide ABC transporter p(...)_3540	1.19e-05	1.55e-05	0.0141189
tetratricopeptide repeat domain 38	3.93e-05	4.39e-05	0.0142371
limonene-12-epoxide hydrolase	6.44e-06	8.91e-06	0.0142704
Transcriptional regulator (CarD family	0.000123108	0.000141071	0.0143267
phosphoglycerate kinase	0.000311337	0.000335753	0.0144756
Uncharacterized protein conserved in bacteria (DUF2199)	3.04e-06	2.39e-06	0.0145091
The RuvA-RuvB complex in the presence of(...)_5832	0.000183886	0.000196378	0.0145529
fatty acid desaturase	2.36e-05	1.86e-05	0.0145651
Transmembrane protein 175	1.98e-07	7.29e-08	0.0145994
Protein of unknown function (DUF3168)	1.92e-06	7.79e-07	0.0146951
CDP-glycerol poly(glycerophosphate) glyc(...)_825	8.7e-06	5.97e-06	0.014763
Tetr family transcriptional regulator	0.000237373	0.000256303	0.0147752
Pfam:Pili_assembly_N	1.66e-06	2.51e-06	0.0149444
One of the primary rRNA binding proteins(...)_3554	0.000270182	0.000292286	0.0150548
TerD domain	5.06e-07	1.34e-07	0.015424
Mg chelatase subunit ChlI	0.000352344	0.000366377	0.0154361
padr family transcriptional regulator	2.89e-06	1.48e-06	0.0154584
protein N-acetylglucosaminyltransferase activity	0.000185783	0.000161082	0.0156435
Component of the ubiquinol-cytochrome c (...)_1329	0.000684844	0.000722109	0.0157507
subunit m	0.000515734	0.000552306	0.0158055
Sarcosine oxidase (Beta subunit)	5.23e-05	6.85e-05	0.0158808
Protein of unknown function (DUF3644)	9.12e-07	4.67e-07	0.0159146
Extensin Family	6.71e-05	8.3e-05	0.0159372
Fatty Acid Hydroxylase	8.3e-06	9.74e-06	0.0163235
VWA domain protein interacting with AAA ATPase	4.66e-06	3.18e-06	0.0163661
Electron transfer flavoprotein	0.000498474	0.00055748	0.0164196
H4MPT-linked C1 transfer pathway protein	1.08e-05	1.31e-05	0.0164752
Band 7 family protein	2.06e-06	1.23e-06	0.0167357
dnaJ domain-containing protein	7.74e-06	4.29e-06	0.0168847
The UvrABC repair system catalyzes the r(...)_5833	0.00130499	0.00139555	0.0169193
UPF0102 protein	0.000159666	0.000150889	0.0169992
Oxidoreductase family, NAD-binding Rossmann fold	1.72e-05	1.39e-05	0.017076
Catalyzes the synthesis of alpha-ribazol(...)_1115	3.99e-05	4.75e-05	0.0171536
The glycine cleavage system catalyzes th(...)_5843	0.000556138	0.000599919	0.0171658
Spermidine putrescine abc transporter, permease protein	2.34e-06	3.09e-06	0.0172091
exonuclease RNase T and DNA polymerase III	9.71e-08	5.6e-07	0.0172641
UPF0225 protein	2.12e-05	1.86e-05	0.017309
nudix family hydrolase	2.9e-06	1.67e-06	0.0173211
acetone carboxylase, gamma subunit	9.11e-07	1.91e-06	0.0173998
this subunit has chaperone activity. The(...)_9254	0.000298116	0.000327373	0.0175962
short chain dehydrogenase	8.86e-05	0.00011353	0.0179078
Protein of unknown function (DUF3302)	2.45e-06	1.81e-06	0.0182296
Bacterial protein of unknown function (DUF934)	9.95e-06	1.42e-05	0.0182417
dual specificity protein phosphatase	1.1e-05	8.89e-06	0.0184798
rard protein	5.15e-05	5.55e-05	0.0185368
site-specific recombinase, phage integrase family protein	1.15e-06	2.41e-06	0.0186213
ROK family	0.000289331	0.00030621	0.0186448
DNA transposition protein	2.72e-06	1.73e-06	0.018657
Acetyl-CoA acetyltransferase	1.09e-05	1.4e-05	0.0188771
KEOPS complex Cgi121-like subunit	1.46e-07	5.67e-07	0.0189098
Zeta toxin	2.22e-05	1.75e-05	0.0190205
Tryptophan halogenase	8.5e-05	9.92e-05	0.0191923
abc-type sugar transport system periplas(...)_6638	1.52e-07	8.15e-07	0.0194061
Hydantoin racemase	1.26e-05	1.89e-05	0.0196247
Phosphatidylinositol 3- and 4-kinase	9.23e-07	4.12e-07	0.0196368
Hydra magnipapillata	1.05e-06	3.3e-07	0.0196604
malate synthase	0.000231739	0.000260277	0.0197919
acyl protein synthase acyl-CoA reductase-like protein	1.38e-05	1.07e-05	0.0198966
phage protein GP19	2.45e-06	1.24e-06	0.0200159
Bacterial type II_III secretion system short domain	1.69e-06	9.87e-07	0.0200597
conserved protein UCP033563	8.04e-05	8.81e-05	0.0202583
glycosyl transferase, family 8	1.71e-06	8.87e-07	0.0202805
type IV pilus assembly protein PilP	1.46e-06	9.92e-07	0.0202927
Phenylacetate-CoA oxygenase, subunit	0.000284352	0.000312106	0.0203696
tonB-dependent Receptor Plug	5.91e-06	4.67e-06	0.0204032
Extradiol ring-cleavage dioxygenase LigAB, LigA subunit	2.76e-06	4.72e-06	0.020437
ACT domain protein	1.39e-05	1.2e-05	0.0206089
Functions as a ribosomal silencing facto(...)_2246	0.00018126	0.000193483	0.0207693
glycosyl hydrolase family 32	1.4e-05	1.76e-05	0.0208038
Protein of unknown function (DUF1679)	5.53e-06	7.31e-06	0.0208273
cellular component movement	6e-06	2.63e-06	0.0208498
Cysteinyl-tRNA synthetase	0.000354583	0.000375309	0.0209792
lipopolysaccharide core biosynthesis protein	8.79e-07	1.7e-06	0.0210229
Necessary for formate dehydrogenase activity (By similarity)	0.000136655	0.000149442	0.0210455
Catalyzes a 2-step reaction, involving t(...)_952	0.000131485	0.000143287	0.0211003
ATPase, Ca transporting, plasma membrane	6.07e-07	1.95e-07	0.0214559
Substrate-binding protein	2.5e-07	5.49e-07	0.0215664
Domain of unknown function DUF21	3.68e-06	2.39e-06	0.0216775
Associates with the EF-Tu.GDP complex an(...)_614	0.000270013	0.000281229	0.0217333
SMI1 KNR4 family protein	6.54e-08	4.49e-07	0.0218412
Oligopeptidase b	0.000161711	0.0001976	0.0218534
Class III signal peptide	8.28e-07	3.01e-07	0.0220175
hydrolase, family 25	3.8e-05	4.69e-05	0.0220505
Glycosyltransferase family 25 (LPS biosynthesis protein)	6.08e-07	1.62e-06	0.0221275
Exonuclease-like protein	2.62e-05	2.25e-05	0.0221397
Type I secretion membrane fusion protein (HlyD	0.000104524	0.000118606	0.0221947
synthetase	0.000128979	0.00014729	0.0222177
Fructosamine	3.29e-05	2.6e-05	0.0222611
dihydrodipicolinate reductase	3.33e-05	3.66e-05	0.0222733
Catalyzes the interconversion of 2-phosp(...)_1059	0.000303347	0.000324524	0.0223069
Drtgg domain protein	9.35e-07	1.43e-06	0.0226582
Protein of unknown function (DUF433)	0.000100061	7.42e-05	0.0227629
tRNA processing	1.1e-05	7.29e-06	0.0228635
type II secretion system protein E	1.38e-07	1.96e-08	0.0228757
lipopolysaccharide biosynthetic process	3.41e-06	5.72e-06	0.0229183
glutathione s-transferase	7.62e-06	1.01e-05	0.022984
Protein of unknown function (DUF2442)	3.32e-05	2.57e-05	0.023051
Domain of unknown function (DUF2760)	7.05e-06	5.52e-06	0.0230742
Glucoside xylosyltransferase	2.47e-07	5.5e-08	0.0231738
Major Facilitator	0.000446276	0.000491395	0.0232936
Domain of unknown function (DUF333)	3.23e-08	2.8e-07	0.0233577
Transposase (IS4 family protein)	9.74e-06	7.74e-06	0.0234991
Mg2 transport protein CorA	8.37e-06	1.02e-05	0.023568
Receptor family ligand-binding protein	5.2e-07	1.77e-07	0.0236553
Acts as a processive, ATP-dependent zinc(...)_391	0.000840026	0.000888372	0.0237528
Protocatechuate 4,5-dioxygenase subunit beta	1.05e-05	9.31e-06	0.0238473
Domain of unknown function (DUF1844)	2.27e-05	1.79e-05	0.0239268
zn-ribbon RNA-binding protein	1.55e-06	6.68e-07	0.023939
nh(3)-dependent nad( ) synthetase	0.000397295	0.000429049	0.0241494
AIG2 family	1.99e-05	2.33e-05	0.0242034
Pfam:GSPII_G	2e-06	1.28e-06	0.0246859
Binding-protein-dependent transport syst(...)_746	3.94e-05	4.82e-05	0.0249234
developmental regulator SasN	5.52e-07	1.9e-07	0.0249567
PAP2 superfamily domain protein	3.19e-06	4.02e-06	0.0251246
Folylpolyglutamate synthase	0.000227736	0.000243017	0.0252216
HpaB protein	3.76e-08	3.4e-07	0.0252338
pilus assembly protein PilX	1.36e-06	2.12e-06	0.0252784
plasmid partition protein ParA-like protein	1.24e-08	1.53e-07	0.0253007
CRISPR-associated protein (Cas_csx3)	7.23e-07	1.97e-07	0.0253655
pseudaminic acid biosynthesis-associated protein PseG	1.26e-05	1.04e-05	0.0255778
Transporter Drug Metabolite Exporter family	6.59e-06	1.03e-05	0.0256413
BTB POZ domain containing	1.21e-07	0	0.0260655
Uncharacterised ACR, YkgG family COG1556	1.59e-05	1.84e-05	0.0261087
Glyoxalase bleomycin resistance protein	7.57e-07	3.1e-07	0.0262079
Protein of unknown function (DUF2497)	2.66e-05	3.31e-05	0.0263932
Catalyzes the reversible interconversion(...)_1098	0.000407126	0.000443778	0.0264162
Low specificity phosphatase (HAD superfamily)-like protein	1.16e-06	2.35e-06	0.0264485
beta-amylase	5.1e-07	1.57e-07	0.0264708
Iron donor protein CyaY	5.38e-06	4.1e-06	0.0265898
nucleotidase	9.56e-07	1.47e-06	0.0269035
Maoc-like dehydratase	7.76e-07	3.48e-07	0.0270731
Zinc finger, CDGSH-type domain protein	5.62e-05	6.46e-05	0.0271086
flagellar protein FlaG	4.2e-06	3.48e-06	0.0271512
Acts as a sulfur carrier required for mo(...)_392	2.37e-06	1.09e-06	0.0271948
MtN3 and saliva related transmembrane protein	3.52e-05	4.14e-05	0.0272378
Crispr-associated ramp protein	4.27e-06	1.62e-06	0.0274777
Enzyme of the cupin superfamily	2.24e-05	3.18e-05	0.0274899
parallel beta-helix repeat	7.6e-06	6.5e-06	0.027502
arginyL-tRNA synthetase	0.000381384	0.000418242	0.0277315
Modification methylase NspV	9.72e-07	6.39e-07	0.0277437
Poorly processive error-prone DNA polyme(...)_4230	0.000443253	0.000481926	0.0278188
Penicillin	3.18e-06	1.99e-06	0.0279503
CBS Domain protein	0.000409508	0.000422451	0.0280372
Part of the Sec protein translocase comp(...)_3736	0.000785694	0.000858546	0.0281723
Fibronectin type iii domain protein	2.3e-05	1.5e-05	0.0282598
Catalyzes the decarboxylation of orotidi(...)_1031	0.000199319	0.000208868	0.0282719
VIT family	2.97e-06	3.92e-06	0.0284015
Cytochrome C Oxidase, Subunit III	0.000350337	0.000377281	0.0284452
ATP-binding protein	0.000526549	0.00054822	0.0285338
Inorganic pyrophosphatase	7.03e-06	5.18e-06	0.0286848
ERCC4 domain protein	9.08e-07	5.22e-07	0.0287626
Uncharacterized conserved protein (COG2071)	5.25e-05	4.21e-05	0.0288414
phospholipase c	2.48e-08	1.28e-07	0.0289193
allergen V5 Tpx-1 family protein	3.55e-06	4.43e-06	0.0292075
Ferredoxin	0.000332112	0.000362368	0.0292196
LysR family	1.17e-06	2.14e-06	0.0293082
YCII-related domain protein	4.27e-06	6.31e-06	0.0295728
Domain of unknown function (DUF802)	3.39e-06	4.53e-06	0.0296172
BAX protein	5.54e-06	6.26e-06	0.0296293
penicillin-binding protein	0.00124639	0.00133449	0.0296519
Catalyzes the reversible conversion of 2(...)_1095	0.000394111	0.000429468	0.0298047
CRISPR-associated protein Cas6	1.67e-07	0	0.0298607
exodeoxyribonuclease v alpha	0.000205222	0.000217514	0.0299356
Protein of unknown function (DUF1013)	7.47e-05	9.2e-05	0.0300015
sensor Signal transduction histidine kinase	1.3e-05	1.79e-05	0.0300137
Sarcosine oxidase, gamma subunit	1.11e-05	1.58e-05	0.0302195
Plasmid stabilization system	6.33e-05	4.83e-05	0.0303052
vegetative protein	8.47e-07	8.11e-08	0.0303174
Pyrophosphatase	5.65e-07	1.05e-07	0.0304604
Endolysin	4.08e-07	9.69e-07	0.030494
ABC-type transport system ipermease component	8.07e-06	1.07e-05	0.0306785
Putative transmembrane protein (PGPGW)	6.58e-06	7.58e-06	0.0308607
MT-A70 family	1.12e-05	7.69e-06	0.0309725
adenine deaminase	6.21e-05	8.08e-05	0.0309947
ParB-like nuclease domain-containing protein	5.29e-07	1.91e-07	0.031169
Required for accurate and efficient prot(...)_5238	0.000548726	0.000602467	0.0312246
Stress-induced bacterial acidophilic repeat motif	6.75e-06	4.86e-06	0.0312368
ANTAR domain	8.09e-07	1.61e-06	0.0312823
Restriction modification system DNA (Specificity	6.03e-05	4.27e-05	0.0312945
Membrane protein involved in the export (...)_3143	1.25e-05	1.78e-05	0.0313384
phosphoribosylaminoimidazole carboxylase atpase subunit	0.000186891	0.000207016	0.0313933
SMP-30 Gluconolaconase LRE domain protein	2.33e-07	5.39e-07	0.0314166
Uncharacterised protein family (UPF0156)	3.32e-06	2.12e-06	0.0314287
Mannosyl oligosaccharide glucosidase	3.78e-07	2.06e-07	0.0314409
Lysyl Oxidase	0	7.89e-08	0.0314839
kelch repeat	1.18e-06	7.91e-07	0.0315602
Ring cyclization and eight-electron oxid(...)_5344	4.25e-05	5.15e-05	0.0316051
Archaeal ATPase	1.36e-05	9.52e-06	0.0316899
dihydrolipoyl dehydrogenase	0.00108992	0.00118939	0.0317233
Domain of unknown function DUF11	8.86e-06	6.84e-06	0.0317578
phospholipase Carboxylesterase	7.3e-05	7.86e-05	0.0318027
amino acid efflux protein	7.37e-07	1.27e-06	0.0318149
it plays a direct role in the translocat(...)_7924	0.000245825	0.00026449	0.0318383
Protein of unknown function (DUF3035)	1.89e-05	2.54e-05	0.0318505
MerC mercury resistance protein	1.42e-05	1.75e-05	0.0318627
protein kinase c	8.59e-07	1.56e-06	0.0318748
O-methyltransferase	0.000131879	0.000125592	0.0319502
Anthranilate phosphoribosyltransferase	0.000228644	0.000247074	0.0320388
SapC family	3.37e-05	4.01e-05	0.0322017
Band 7 protein	0.000893848	0.000962829	0.0324475
Protein of unknown function (DUF779)	6.21e-06	9.21e-06	0.0325889
Type II restriction enzyme HinfI	1.88e-07	6e-07	0.0326231
ATP-dependent specificity component of t(...)_319	0.000478628	0.00053033	0.0328188
riboflavin synthase (EC 2.5.1.9)	2.53e-07	5.07e-08	0.0328513
Putative transmembrane protein (Alph_Pro_TM)	4.78e-05	5.98e-05	0.0329248
atp synthase	8.23e-05	8.86e-05	0.0330773
phage DNA Packaging protein	5.59e-05	6.96e-05	0.0331214
Streptomycin adenylyltransferase	4.03e-07	1.28e-06	0.033186
Protein of unknown function (DUF2937)	6.62e-06	8.22e-06	0.0332309
metal-dependent hydrolase	2.89e-05	3.91e-05	0.0332431
4-Hydroxyphenylpyruvate dioxygenase	0.000209202	0.000232912	0.0332767
VWA	1.64e-05	1.32e-05	0.0332999
Protein of unknown function (DUF3298)	1.75e-05	2.1e-05	0.033439
Pyruvate kinase	0.000351739	0.000373502	0.0334721
Solute carrier family 27 (Fatty acid transporter), member	5.61e-07	1.25e-06	0.0335064
Methyl-accepting chemotaxis sensory transducer	2.06e-05	2.3e-05	0.0335611
Joins Ado-cobinamide-GDP and alpha-ribaz(...)_2833	2.46e-05	3.05e-05	0.0335949
PBS lyase HEAT domain protein repeat-containing protein	1.46e-05	8.79e-06	0.0338661
Required for meiotic nuclear division 1 (...)_5243	2.09e-05	1.98e-05	0.0339653
adenylate	7.94e-06	1.06e-05	0.0341162
Choline kinase	1.21e-05	1.85e-05	0.0342141
Uridine phosphorylase	2.13e-05	2.96e-05	0.0342477
serine threonine phosphoprotein phosphatase	2.73e-06	1.2e-06	0.0342599
RND superfamily	0.000116488	0.000136826	0.0343361
Major capsid protein	3e-06	1.52e-06	0.0344546
Predicted metal-binding protein (DUF2284)	3.53e-06	8.6e-06	0.0345762
NnrU protein	9.36e-06	1.38e-05	0.0346428
homoserine dehydrogenase	0.00031124	0.000329362	0.0348367
lysine biosynthesis protein LysW	3.46e-06	1.98e-06	0.0349896
Catalyzes the NADPH dependent reduction (...)_977	0.000187522	0.000210712	0.0350239
regulator	6.06e-05	5.47e-05	0.0351659
bioh protein	4.13e-06	6.32e-06	0.035178
Cell Division Protein	0.000562648	0.000594265	0.0352953
Transcription factor that acts by bindin(...)_5965	0.000225721	0.000234738	0.0353524
cytidylyltransferase	7.65e-05	6.12e-05	0.0353958
oxidoreductase	0.00395809	0.00422544	0.035449
Protein of unknown function (DUF690)	4.76e-07	2.33e-07	0.0355237
insertion element IS1121 transposase	8.6e-07	1.19e-06	0.0356094
This is one of the proteins that binds t(...)_5885	0.000214812	0.000231088	0.0356216
zn-dependent hydrolase	1.7e-07	1.88e-08	0.0357622
phosphoribosylformylglycinamidine synthase	0.000812911	0.000906579	0.0358159
carboxyl methyltransferase	1.33e-06	2.82e-06	0.0358807
Purine or other phosphorylase family 1	6.95e-06	3.19e-06	0.0359344
Glyoxalase_Bleomycin resistance protein_(...)_2464	5.08e-05	5.61e-05	0.0360625
Iron-sulphur cluster biosynthesis	2.4e-06	8.15e-07	0.0361506
ECF subfamily RNA polymerase	2.95e-06	1.79e-06	0.0363013
Bacterial extracellular solute-binding p(...)_666	0.000122231	0.00015109	0.0364082
Pfam:DUF2134	4.1e-06	6.29e-06	0.0364424
asparaginase	0.000118229	0.000132111	0.0364985
Succinyl-CoA ligase ADP-forming subunit alpha	0.000341795	0.000377687	0.036543
phage P1-related protein	5.64e-07	1.1e-07	0.0366422
penicillin-binding protein 1A	0.000427905	0.00048414	0.0366855
peptide transport system permease protein	1.53e-07	4.66e-07	0.0366977
cell division protein FtsK	0.000540305	0.000582238	0.0368048
glycerol-3-phosphate dehydrogenase	0.000416303	0.000460191	0.036827
Catalyzes the addition of meso-diaminopi(...)_987	0.000390442	0.000415976	0.0368493
Protein of unknown function (DUF3575)	2.02e-07	6.91e-07	0.0369572
K06886 hemoglobin	0.000149128	0.000143454	0.0370234
K07001 NTE family protein	0.00032398	0.00035784	0.0370579
ABC transporter	0.000278244	0.000299438	0.0371344
Essential cell division protein that for(...)_1991	0.000370726	0.000405644	0.0371465
Phage major tail protein 2	3.48e-07	5.95e-08	0.0371901
alanine dehydrogenase	0.000186702	0.000208379	0.0372337
pdp protein	2.49e-05	2.9e-05	0.0374163
P-aminobenzoate N-oxygenase AurF	3.8e-05	4.86e-05	0.0374502
Histidine kinase-, DNA gyrase B-, and HSP90-like ATPase	8.83e-06	5.3e-06	0.0375289
glyoxalase domain containing 5	5.37e-06	7.2e-06	0.0375725
Heme NO binding domain protein	3.67e-06	2.23e-06	0.0375847
Activator of Hsp90 ATPase homolog 1-like protein	5.12e-05	5.78e-05	0.0377251
major facilitator Superfamily	0.00130159	0.00137841	0.0380177
phospho-N-acetylmuramoyl-pentapeptide-transferase activity	0.000418254	0.000447354	0.0380825
Acyl-CoA dehydrogenase, N-terminal domain	3.75e-06	5.83e-06	0.0380947
Ig domain protein group 2	3.64e-06	2.08e-06	0.0381504
ATP-grasp fold domain protein, DUF201-type	7.36e-06	9.18e-06	0.0382045
secreted glycosyl hydrolase	3.69e-05	4.22e-05	0.0382493
The glycine cleavage system catalyzes th(...)_5841	0.00050876	0.000577201	0.0383467
Protein of unknown function (DUF1203)	2.45e-05	2.71e-05	0.0384345
Patatin family	2.53e-05	2.98e-05	0.0384579
UPF0391 membrane protein	3.45e-05	2.7e-05	0.0384701
VanW family	2.43e-05	2.02e-05	0.0384823
CDP-alcohol phosphatidyltransferase	9.85e-06	1.2e-05	0.0385394
FHA domain protein	7.22e-07	2.18e-07	0.0386596
glycine amidinotransferase activity	2.23e-06	3.39e-06	0.0387452
conserved protein	0.00143773	0.00148361	0.0388645
Pfam:DUF477	8.23e-05	9.11e-05	0.0388875
Addiction Module Antidote	2.01e-05	1.61e-05	0.0389334
CRISPR (clustered regularly interspaced (...)_846	7.2e-06	4.94e-06	0.0390082
FHA domain	1.59e-05	1.31e-05	0.0390623
Allophanate hydrolase, subunit 1	7.7e-05	8.29e-05	0.0391396
hydrolase, family 8	1.23e-05	9.77e-06	0.0391835
Converts heme B (protoheme IX) to heme O(...)_1375	0.000249738	0.000261446	0.0393406
The central subunit of the protein trans(...)_5837	0.000402654	0.000434416	0.0393528
pyridine nucleotide-disulfide oxidoreductase	0.000636689	0.000699666	0.0393864
Flagellar filament outer layer protein Flaa	9.2e-08	0	0.0394086
Deacylase	0.000367984	0.000406979	0.0394208
ABC transporter, ATP-binding protein-related protein	3.59e-07	1.03e-07	0.0394773
Demethylmenaquinone methyltransferase	2.87e-05	3.24e-05	0.0395108
Prevents misfolding and promotes the ref(...)_4306	0.00103071	0.00115377	0.0395229
Binds together with S18 to 16S ribosomal RNA (By similarity)	0.000210125	0.000227221	0.0395785
Protein of unknown function (DUF3012)	4.49e-08	3.58e-07	0.039711
amino acid regulated cytosolic protein	2.66e-05	3.71e-05	0.0398759
Catalyzes the folate-dependent formation(...)_1041	0.000171837	0.000188119	0.0399881
6-hydroxynicotinate reductase	2.08e-05	2.56e-05	0.0400844
conserved protein UCP032025	4.42e-05	5.58e-05	0.0401595
ATP-dependent CLP protease ATP-binding subunit	0.0016525	0.00175705	0.0403499
transcriptional regulator AsnC family	0.00037281	0.00043335	0.0403731
gCN5-related N-acetyltransferase	0.000154089	0.000141297	0.0403853
Binds directly to 23S rRNA. The L1 stalk(...)_752	0.000295285	0.000321108	0.040525
Monooxygenase	0.00143415	0.00161088	0.0405894
Catalyzes the conversion of D-ribulose 5(...)_1011	0.000361804	0.000390032	0.040612
Predicted secreted protein (DUF2259)	2.44e-06	4.19e-06	0.0411319
Methyltransferase domain	0.000110187	9.24e-05	0.0411766
phosphonate metabolism protein	3.21e-05	4.28e-05	0.0411998
HEPN domain protein	1.4e-06	8.8e-07	0.0412876
Located at the top of the head of the 30(...)_2979	0.000240101	0.000263342	0.0413418
Homoserine O-transsuccinylase	3.05e-05	3.45e-05	0.0414273
Methylenetetrahydrofolate reductase	0.000337679	0.00036983	0.0416973
RteC protein	0	1.44e-07	0.0417607
Protein of unknown function (DUF1052)	5.08e-05	6.2e-05	0.0419238
Catalyzes the oxidation of the C8 methyl(...)_1074	0.000169479	0.000188464	0.0420442
deoxyguanosinetriphosphate triphosphohydrolase-like protein	0.000176175	0.000193709	0.0422079
Acts as a flagellar brake, regulating sw(...)_390	3.12e-06	1.99e-06	0.0422201
flagellar protein flis	2.53e-06	3.57e-06	0.0425264
protease inhibitor	8.84e-07	1.56e-06	0.0425496
Tpr domain-containing protein	1.99e-07	3.53e-08	0.0428328
Branched-chain amino acid transport protein (AzlD)	1.03e-06	1.82e-06	0.0429929
lamb ycsf family protein	5.94e-05	6.5e-05	0.0431114
Methyl-accepting chemotaxis	0.000645335	0.000693894	0.0432301
Predicted small integral membrane protein (DUF2165)	1.9e-07	0	0.0433697
UV damage endonuclease	8.54e-06	6.84e-06	0.0434594
PRTRC system ThiF family protein	2.77e-06	1.7e-06	0.0436345
Dehydrogenase reductase	0.00197625	0.00213163	0.0437864
Protein involved in MetA-pathway of phenol	3.52e-07	7.87e-07	0.043833
glycyl-tRNA synthetase, alpha subunit	0.000226741	0.000256073	0.0440051
Rod binding protein	3.25e-06	1.53e-06	0.0440275
Protein of unknown function (DUF3445)	1.94e-05	2.35e-05	0.0441254
5-carboxymethyl-2-hydroxymuconate	1.63e-05	1.77e-05	0.0442234
Seems to be the binding site for several(...)_5473	0.000237313	0.000248732	0.0442878
Glycine betaine	8.64e-05	0.000108125	0.0445139
Angiogenic factor with G patch and FHA domains	1.13e-07	7.87e-08	0.0446227
Predicted membrane protein (DUF2142)	5.82e-07	7.46e-08	0.0447323
anti-sigma K factor Rska	2.42e-05	2.78e-05	0.0447444
Pfam:DUF540	7.55e-06	1.13e-05	0.0448325
Prim-Pol	2.58e-07	2.41e-08	0.0449099
LemA family	0.000299872	0.000315702	0.0449683
ohcu decarboxylase	4.84e-05	5.81e-05	0.0450128
transcriptional regulator, LuxR family	8.54e-06	6.76e-06	0.0450463
RND type efflux pump	6.28e-08	8.64e-07	0.0452191
Phosphoenolpyruvate Carboxylase	0.000253183	0.000291762	0.0452945
Protein of unknown function (DUF3626)	2.05e-06	1.21e-06	0.0455015
2,5 RNA ligase	2.4e-08	1.65e-07	0.0455353
Specifically catalyzes the decarboxylati(...)_5579	0.000485912	0.000540682	0.0456017
Protein of unknown function (DUF3616)	8.81e-06	6.35e-06	0.0456989
peptidase C2 calpain	1.09e-07	5.1e-08	0.0457557
Monomethylamine methyltransferase	1.7e-07	6.54e-07	0.0458547
(MSHA) biogenesis protein MshP	3.88e-07	9.37e-08	0.0459502
SAF domain	3.09e-06	1.45e-06	0.0459855
RNA ligase	8.22e-06	6.44e-06	0.0461263
MDMPI C-terminal domain	8.21e-07	1.71e-06	0.0461706
Key enzyme in the regulation of glycerol(...)_2876	0.000251453	0.000273767	0.0461929
Protein of unknown function (DUF2796)	1.32e-07	3.37e-07	0.0463462
AAA-ATPase	9.24e-06	3.92e-06	0.0464536
Domain of unknown function (DUF3576)	2.4e-05	3.12e-05	0.0464778
Nickel transport complex, NikM subunit, transmembrane	1.58e-06	2.21e-06	0.04649
Beta-lactamase domain protein	0.00133238	0.0014252	0.0465122
peptidase C14 caspase catalytic subunit p20	0.000139475	0.000158985	0.0465777
Produces ATP from ADP in the presence of(...)_4326	0.000590566	0.000661408	0.0466115
Predicted integral membrane protein (DUF2282)	6.4e-06	8.53e-06	0.0467007
Peptidase S16, lon domain protein	0.00014074	0.000151967	0.0468219
selenoprotein	1.54e-05	2.02e-05	0.0468684
imidazoleglycerolphosphate dehydratase	0.000197671	0.000214143	0.0469225
Protein of unknown function (DUF2397)	2.42e-06	1.21e-06	0.0469759
Catalyzes the conversion of epoxyqueuosi(...)_1019	0.000226265	0.00023977	0.0470191
metalloenzyme domain protein	8.16e-06	4.16e-06	0.0470942
outer membrane protein probably involved in nutrient binding	2.02e-06	4.77e-06	0.0472245
Gliding motility-associated protein GldC	9.2e-06	1.24e-05	0.0472886
Calcium-binding EF-hand-containing protein	3.02e-07	5.3e-07	0.0474081
Protein of unknown function (DUF3303)	1.63e-05	1.69e-05	0.0475075
extracellular solute-binding protein	7.92e-05	0.000101016	0.0475196
GTPase that associates with the 50S ribo(...)_2295	0.000326291	0.000357546	0.0476063
Cell morphology protein	1.26e-07	5.12e-07	0.0476709
amino acid ABC transporter	0.000156833	0.000181072	0.0477245
YcgL domain-containing protein	0	2.75e-07	0.0478554
protein ExbD TolR	1.16e-05	8.88e-06	0.0479659
Interacts with and stabilizes bases of t(...)_2750	0.000247315	0.000266133	0.0479882
flagellar protein	3.37e-05	4.29e-05	0.0480114
6-pyruvoyltetrahydropterin synthase activity	0.00016042	0.000151634	0.0480659
AraC_E_bind	1.68e-06	2.65e-06	0.0480994
Predicted permease YjgP_YjgQ family	5.11e-07	6.5e-08	0.048142
coenzyme PQQ	6.76e-07	9.29e-08	0.0482412
Bacterial extracellular solute-binding protein	1.54e-05	2.01e-05	0.0482857
Phosphoesterase	2.05e-06	1.31e-06	0.0484853
ubiquinone biosynthesis protein Coq9	1.95e-05	2.54e-05	0.0486349
PBS lyase	2.47e-06	1.74e-06	0.0487199
amino acids such as valine, to avoid suc(...)_6769	0.000686476	0.000762035	0.0487321
Scaffold protein Nfu NifU	3.49e-07	8.37e-07	0.0488399
replication protein	1.67e-07	5.18e-08	0.0489068
glyoxalase family	1.59e-05	2.11e-05	0.048995
phosphoribosylformimino-5-aminoimidazole(...)_8588	0.000186631	0.000200099	0.0490588
Involved in a type II secretion system ((...)_2762	2.09e-06	2.74e-06	0.0492274
Competence protein	0.000252206	0.000239719	0.0492819
cysteine biosynthetic process from serine	0.000634118	0.000692114	0.0493365
peptidase domain-containing protein	8.72e-07	3.82e-07	0.0493947
Plasmid pRiA4b ORF-3-like protein	7.98e-06	1.18e-05	0.0494172
50s ribosomal protein l29	0.000146322	0.000160147	0.0494397
Methyltransferase NNMT PNMT TEMT	8.5e-07	1.29e-07	0.0494824
Protein of unknown function, DUF484	1.2e-05	1.48e-05	0.0495373
Hydrogenase 2-specific chaperone	2.15e-06	1.3e-06	0.0495608
Capsule polysaccharide biosynthesis protein	2.57e-05	1.6e-05	0.049883
Nitrate reductase delta subunit	2.31e-06	1.59e-06	0.0499388
ABC transporter, ATP-binding protein	2.69e-06	4.2e-06	0.049951

## Sheet: Data S2 DC VS CC
EggNOG category	mean(CC)	mean(DC)	P value
TrbM protein	3.56e-07	0	0.00013746
capsule biosynthesis phosphatase	1.48e-06	1.32e-07	0.000222161
Peptide Chain Release Factor	1.54e-05	1.18e-05	0.000340236
Protein of unknown function (DUF1444)	1.98e-06	6.9e-07	0.000411499
ATPase 116 kDa subunit	9.77e-06	7.16e-06	0.000482102
Stage II sporulation protein	7.74e-07	4.29e-07	0.000538716
Repressor protein MetJ	4.64e-07	0	0.00054973
Involved in allosteric regulation of asp(...)_2764	7.34e-06	4.55e-06	0.000617028
RecF protein ABC transporter	4.54e-08	3.23e-07	0.000769358
LamG domain-containing protein	3.33e-07	9.12e-07	0.000906047
Periplasmic binding protein	0.000183058	0.000193682	0.00093898
lysine biosynthesis protein LysW	4.04e-06	7e-06	0.000983368
Catalyzes the addition and repair of the(...)_986	4.25e-06	2.73e-06	0.00101906
cytotoxic translational repressor	6.21e-07	1.08e-06	0.00107292
DNA topoisomerase type IA Zn finger	3.35e-06	1.45e-06	0.00115123
Transaldolase	9.82e-07	3.23e-07	0.00129684
frv operon regulatory protein	3.94e-06	5.5e-06	0.00136238
peptidoglycan-binding domain 1	1.93e-05	1.28e-05	0.00139465
metal-dependent hydrolase (By similarity)	3.92e-05	4.64e-05	0.00141778
Transport-associated	9.37e-06	4.28e-06	0.00146558
Domain of unknown function (DUF1707)	2.29e-06	3.97e-06	0.00147659
Bor protein	1.11e-06	3.01e-06	0.00156207
FIST C domain	1.53e-06	4.01e-07	0.00165349
DNA-dependent RNA polymerase catalyzes t(...)_1626	2.66e-05	1.37e-05	0.00173455
Toxin-antitoxin system, toxin component, Fic family	2.46e-05	1.71e-05	0.0017676
Protein of unknown function (DUF2934)	5.34e-06	3.39e-06	0.00177861
Pfam:Transposase_17	3.75e-05	4.54e-05	0.0018773
GAF sensor signal transduction histidine kinase	1.09e-06	2.17e-06	0.00212634
Phosphoribosylformylglycinamidine synthase, purS	1.06e-05	5.55e-06	0.00226435
Sodium_hydrogen exchanger family	4.31e-06	7.04e-06	0.00234189
DNA ligase	0.00089285	0.00104492	0.00237912
formylmethanofuran dehydrogenase, subunit	3.82e-06	1.9e-06	0.00246988
Glucuronic acid epimerase	8.09e-07	1.14e-06	0.00248089
K13735 adhesin invasin	1.5e-07	3.08e-08	0.00258222
Archaeal protein of unknown function (DUF650)	6.71e-06	3.22e-06	0.00259324
General secretion pathway protein C	7.51e-06	4.46e-06	0.00270063
May catalyze the methylation of C-1 in c(...)_3117	1.33e-05	7.88e-06	0.00273521
UDP-galactopyranose mutase	5.45e-05	7.31e-05	0.00280108
h aca RNA-protein complex component gar1	4.71e-06	2.17e-06	0.00282223
Modulates RecA activity (By similarity)	4.89e-05	5.55e-05	0.00287421
Involved in regulation of DNA replication (By similarity)	1.16e-05	5.98e-06	0.00308944
conjugative transposon protein TraF	8.93e-07	2.27e-06	0.00312303
K -transporting ATPase, F subunit	3.18e-07	0	0.00318669
UPF0201 protein	6.81e-06	2.69e-06	0.00326919
Dna topoisomerase	0.000134731	0.000166264	0.00331292
AP2 ERF and B3 domain-containing	0	1.41e-07	0.00332393
Type IV pilus biogenesis protein PilE	1.42e-05	1.17e-05	0.00349598
AraC family transcriptional regulator	0.000182507	0.000204713	0.00362099
lysyl-trna synthetase	0.000250584	0.000270933	0.00369743
DNA primase is the polymerase that synth(...)_1592	1.07e-05	5.36e-06	0.00372894
lycopene	9.57e-08	0	0.00377553
Adenine-specific	1.34e-05	8.23e-06	0.0038219
cereblon	8.29e-07	2.78e-07	0.00384326
acyltransferase 3	6.54e-05	6.04e-05	0.00386639
Protein of unknown function (DUF3208)	2.55e-08	2.25e-07	0.00394118
cullin 1	1.66e-08	1.94e-07	0.00398744
glycosyl transferase, family 8	8.37e-07	1.55e-06	0.00406719
Catalyzes the interconversion of 2-phosp(...)_1059	0.000318079	0.000303035	0.00426985
Sugar-specific transcriptional regulator TrmB	2.92e-06	1.5e-06	0.00436215
Transposase DNA-binding domain family	0	1.34e-07	0.00437317
FemAB family	6.51e-06	8.05e-06	0.00447946
Haloacid dehalogenase-like hydrolase	1.69e-07	7.07e-07	0.00459786
chromosome 9 open reading frame 114	5.49e-06	2.08e-06	0.00469182
Anti sigma-E protein RseA, N-terminal domain	2.25e-06	7.31e-07	0.0047362
Predicted metal-binding protein (DUF2284)	4.86e-06	2.09e-06	0.00474722
Aluminium activated malate transporter	0	1.47e-07	0.00483985
Curculin domain protein (Mannose-binding) lectin	4.57e-07	2.26e-07	0.00503701
Transposase of ISThsp10, IS21 family, C (...)_6073	1.09e-07	3.3e-07	0.00507424
Bacterial protein of unknown function (DUF882)	7.42e-05	6.41e-05	0.00516676
ATP-NAD AcoX kinase	8.57e-06	5.3e-06	0.00522492
Calcium Proton	5.13e-05	6.19e-05	0.00525961
HPr kinase	1.44e-05	1.83e-05	0.00546062
OmpA-like transmembrane domain	3.64e-06	5.35e-06	0.00595793
formylmethanofuran dehydrogenase, subunit C	7.26e-06	4.42e-06	0.00599218
transposase	0.00259236	0.00228798	0.00611995
KWG leptospira repeat protein	1.95e-06	1.12e-06	0.00636083
Acts as a processive, ATP-dependent zinc(...)_391	0.00083487	0.000915522	0.00640687
Binding-protein-dependent transport syst(...)_747	0.00332665	0.00347465	0.00645291
Notch ligand involved in the mediation o(...)_3489	4.11e-06	2.39e-06	0.00649389
Part of a complex that catalyzes the rev(...)_3722	8.53e-06	4.24e-06	0.00657088
polyhydroxyalkanoic acid system protein	9.23e-06	1.14e-05	0.00660249
Crispr-associated ramp protein, Cmr6 family	5.12e-07	1.97e-07	0.00663972
STAS domain	1.32e-05	1.61e-05	0.00688192
(AraC family) transcriptional regulator	1.73e-06	7.08e-07	0.00689294
prepilin-type N-terminal cleavage methylation	4.57e-06	3.06e-06	0.00699813
UPF0251 protein	2.5e-06	1.11e-06	0.00703106
Conserved protein CoxF	2.05e-06	2.99e-06	0.0071466
Protein of unknown function (DUF2948)	3.4e-05	2.62e-05	0.00736557
ATPase family, AAA	3.12e-08	3e-07	0.00745677
Pfam:UPF0125	1.35e-06	4.01e-07	0.0076243
HPT	1.88e-06	2.93e-06	0.00767761
Glycosyl hydrolases family 18	7.75e-08	3.53e-07	0.00783082
flagellar biosynthesis regulatory protein FlaF	2.72e-05	2.2e-05	0.00784183
BTAD	5.57e-06	8.83e-06	0.00804824
type IV pilus biogenesis stability protein PilW	2.44e-05	2.78e-05	0.00812568
diacylglycerol kinase, catalytic region	1.34e-05	1.9e-05	0.00817028
Glycosyl transferases group 1	5.86e-05	7.17e-05	0.00822337
Pentatricopeptide repeat-containing protein	2.73e-07	1.96e-06	0.00824749
NfeD-like C-terminal, partner-binding	1.81e-05	2.3e-05	0.00826864
DNA sulfur modification protein DndE	4.51e-07	8.29e-08	0.00834563
Domain of unknown function (DUF2007)	1.69e-05	1.37e-05	0.00848342
Methanogenesis marker 16 metalloprotein	2.42e-06	1.44e-06	0.00851702
Lipopolysaccharide transport periplasmic protein LptA	9.81e-07	3.15e-07	0.00867981
Catalyzes the ATP- and formate-dependent(...)_964	1.3e-05	8.43e-06	0.00871065
Pfam:Transposase_9	4.02e-07	7.78e-07	0.00879733
DGC domain	6.55e-06	2.97e-06	0.00882013
membrane protein-like protein	4.8e-06	7.31e-06	0.00886089
NinB protein	1.76e-06	2.49e-07	0.00909109
Nucleoside 2-deoxyribosyltransferase	1.37e-06	2.94e-06	0.0091357
3-hydroxyacyl-CoA dehydrogenase, NAD binding domain	4.75e-07	8.87e-08	0.00919275
Heat shock protein HslJ	3.4e-06	5.41e-06	0.00922547
SH3 domain-containing protein	1.43e-06	2.28e-07	0.00935433
General factor that plays a role in the (...)_2318	3.13e-05	1.4e-05	0.00936535
Protein metal binding site	1.61e-05	1.01e-05	0.00941271
Paraquat-inducible protein b	1.91e-05	2.6e-05	0.00944697
RNA polymerase sigma factor	4.4e-05	3.57e-05	0.00949367
Hemin uptake protein	1.81e-06	1.15e-06	0.0095168
extracellular solute-binding protein, family 1	0.000428042	0.000454979	0.00970481
Hydrogenase 4, membrane component	3.74e-05	3.27e-05	0.0097524
Antibiotic biosynthesis monooxygenase	0.000246704	0.000251767	0.00980912
phosphosulfolactate synthase activity	2.01e-05	2.32e-05	0.00987355
molybdenum hydroxylase accessory protein	4.95e-06	6.95e-06	0.00990351
Cell surface protein	6.15e-06	4.59e-06	0.00995022
Putative redox-active protein (C_GCAxxG_C_C)	2.72e-06	1.22e-06	0.0100303
Domain of unknown function (DUF3601)	4.45e-07	1.15e-06	0.010125
Cysteine rich repeat	1.75e-06	3.13e-06	0.0102398
Cob-I-yrinic acid a,c-diamide adenosyltransferase	5.08e-05	4.09e-05	0.0102612
nitroreductase	0.000455268	0.000415121	0.0102837
formylmethanofuran dehydrogenase subunit B	1.91e-05	1.36e-05	0.0104268
40S ribosomal protein S8	7.29e-06	3.62e-06	0.0104802
transcriptional	0.000145138	0.000167381	0.0105125
relA SpoT domain protein	1.93e-06	3.91e-06	0.0105953
translation initiation factor	6.78e-05	5.3e-05	0.0106185
PsaA and PsaB bind P700, the primary ele(...)_5034	2.02e-06	8.99e-07	0.0106733
Transcriptional regulator, SARP family	9.79e-07	1.6e-07	0.0106843
NADPH Oxidase	1.19e-07	0	0.0109921
Type III secretion	1.24e-05	9.07e-06	0.0110031
metallo-beta-lactamase superfamily protein	1.44e-06	4.86e-07	0.0112951
to Y54G2A.42	0	1.13e-07	0.0113061
arsR family transcriptional regulator	6.64e-05	8.02e-05	0.011376
spherulin 4-like cell surface protein	3.67e-07	1.29e-06	0.011432
lacI family	4.49e-07	2.05e-07	0.0114656
Cytochrome C assembly protein	6.09e-06	4.4e-06	0.0115262
Domain of unknown function (DUF1937)	1.14e-06	3.44e-07	0.0116278
polar flagellar M-ring protein FliF	2.55e-06	1.42e-06	0.0116519
dihydrodipicolinate	6.34e-05	6.99e-05	0.0117697
Tail assembly protein	0	1.34e-07	0.0118164
NHL repeat containing	9.63e-05	0.000109268	0.011851
TfuA domain protein core	9.12e-06	7.78e-06	0.0119206
ATPase (AAA superfamily)-like protein	1.07e-05	1.39e-05	0.0119417
Zinc carboxypeptidase	0.000321805	0.000350668	0.0119527
conserved repeat domain protein	0.000105755	8.69e-05	0.0119638
F5 8 type C domain-containing protein	2.88e-07	9.21e-07	0.0120501
Type II secretion system protein L	3.07e-08	1.29e-07	0.0120742
ATP (GTP)-binding protein	0	2.13e-07	0.0121538
Electron transfer subunit of the peripla(...)_1951	7.49e-06	1.07e-05	0.0121766
Outer membrane chaperone Skp	1.27e-06	6.64e-07	0.0122987
Erf family	6.84e-06	4.11e-06	0.0123765
recT protein	5.84e-06	2.08e-06	0.0124862
Branched-chain carboxylic acid kinase	4.67e-07	1.56e-07	0.0124972
Lipase (class 3)	2.24e-06	7.06e-07	0.0126505
hydrolase	3.94e-05	3.06e-05	0.0126719
hyperosmotically inducible periplasmic protein	8.63e-07	2.07e-06	0.0127263
Catalyzes the attachment of O-phosphoser(...)_988	4.39e-07	1.88e-07	0.0131222
mttA_Hcf106 family	1.03e-05	1.49e-05	0.013154
Protein of unknown function (DUF2955)	2.27e-07	4.75e-07	0.0131781
Nuclear transport factor 2 (NTF2) domain	9.06e-07	3.19e-07	0.0131891
cNMP	4.65e-05	3.8e-05	0.0135769
Protein of unknown function (DUF952)	4.18e-05	3.54e-05	0.0136311
Isochorismatase family	5.64e-06	7.78e-06	0.0136525
Charged multivesicular body protein	1.8e-05	9.11e-06	0.0137339
Histidine triad (HIT) protein	3.66e-06	5.62e-06	0.0137449
Domain of unknown function (DUF2520)	3.78e-06	7.03e-06	0.0137767
RNA polymerase sigma-H factor	1.18e-07	3.94e-07	0.0138707
Glycosyltransferase family 25 (LPS biosynthesis protein)	1.3e-06	6.91e-07	0.0139932
Cytochrome oxidase maturation protein cbb3-type	4.29e-06	3.33e-06	0.0140371
Metallo-Beta-Lactamase	0.000225721	0.000234094	0.0140936
glycoside hydrolase, family 1	4.91e-05	7.25e-05	0.0142019
acyltransferase	3.89e-07	2.65e-08	0.0144376
fxsa cytoplasmic membrane protein	2.18e-05	1.67e-05	0.0144748
Binds double-stranded DNA tightly but wi(...)_754	2.44e-05	1.11e-05	0.0147782
UbiA prenyltransferase	1.56e-05	1.96e-05	0.0148242
Peptidoglycan-binding LysM	8.77e-06	5.67e-06	0.0148924
DNA-directed RNA polymerases I, II, and (...)_1635	1.14e-05	8.02e-06	0.0149257
ApbE family lipoprotein	2.6e-06	4.93e-06	0.015093
P4Hc	1.07e-06	2.19e-06	0.0151636
mandelate racemase muconate lactonizing	0.000858	0.00092406	0.0152308
transporter substrate-binding protein	1.27e-06	2.84e-06	0.0152418
Protein of unknown function (DUF1810)	2.74e-05	3.11e-05	0.0152629
Conserved hypothetical, protein	0.000133768	0.000117753	0.0152965
biotin apo-protein ligase-related	5.8e-07	1.04e-06	0.0153298
Hydrolase	0.00135472	0.00138812	0.0153647
Specifically methylates the N1 position (...)_5583	9.29e-06	3.81e-06	0.0153875
precorrin-4 C(11)-methyltransferase	2.13e-05	1.59e-05	0.0154442
Deoxyribonuclease II	2.7e-06	2.11e-06	0.0155953
Protein of unknown function (DUF1638)	1.51e-05	8.96e-06	0.0156289
3D domain	9.65e-06	1.46e-05	0.0158439
sigma 54 modulation protein S30EA ribosomal protein	4.33e-07	1.18e-07	0.0160296
polysaccharide biosynthesis	1.77e-06	9.56e-07	0.0161327
stress responsive alpha-beta barrel domain protein	1.26e-06	7.45e-07	0.0162141
Isoprenoid biosynthesis protein with ami(...)_2828	2.97e-06	7.65e-07	0.0162585
alpha amylase, catalytic	0.000750495	0.000905516	0.0162905
GHMP kinase	5.8e-07	2.16e-06	0.0164582
Glycosidase	0.000120793	0.0001108	0.0165032
Involved in targeting and insertion of n(...)_2780	6.4e-06	2.51e-06	0.0165143
Plasmid recombination enzyme	1.99e-08	1.33e-07	0.0165502
PATAN domain GTPase-activating protein	4.51e-07	1.48e-08	0.0165713
dna replication licensing factor	1.07e-05	6.01e-06	0.0168873
tail tape measure protein	4.73e-07	8.02e-07	0.0169188
Arsr family transcriptional regulator	2.7e-05	3.15e-05	0.01694
Dimethylates a single guanine residue at(...)_1701	4.88e-06	2.53e-06	0.0170915
Protein of unknown function (DUF498_DUF598)	5.79e-05	5.19e-05	0.0171631
ATP-dependent agmatine transferase that (...)_310	7.59e-06	3.87e-06	0.0171857
Integrase, catalytic region	6.75e-05	5.43e-05	0.0173922
Dabb	2.31e-06	4.06e-06	0.0174463
Acetyl-CoA carboxylase, biotin carboxyl carrier protein	0.000207686	0.000203437	0.0174694
Protein of unknown function (DUF2608)	5.71e-07	2.98e-07	0.017517
glutaredoxin 2	6.65e-06	9.57e-06	0.017594
phosphate	1.28e-06	3.02e-07	0.0176921
Cytochrome p450	0.000515346	0.000469838	0.0177493
Subunit of malonate decarboxylase, it is(...)_5657	3.15e-06	1.2e-06	0.0177968
binding-protein-dependent transport syst(...)_6896	0.000718621	0.000778138	0.0178998
sequence-specific DNA binding	9.44e-05	0.00010016	0.018091
amino acid-binding act	3.26e-07	7.3e-07	0.0181727
Pyruvate kinase, alpha_beta domain	3.23e-06	1.19e-06	0.0181953
phosphoriboisomerase A	0.000104082	9.49e-05	0.0182298
Converts cobyric acid to cobinamide by t(...)_1374	5.17e-05	4.66e-05	0.0182539
Gonadoliberin III-related protein	8.42e-06	5.89e-06	0.0182986
F5_8 type C domain	1.6e-06	2.43e-06	0.018377
Catalytic subunit of the tRNA-splicing l(...)_950	0.00019155	0.000181803	0.0184328
Protein of unknown function (DUF3144)	3.87e-06	1.6e-06	0.0185629
colicin v production protein	4.33e-06	1.86e-06	0.0187399
Tol-Pal system protein	1.08e-06	7.29e-07	0.0188448
Protein of unknown function (DUF3407)	2.13e-08	1.01e-07	0.0189117
oligosaccharyl transferase STT3 subunit	6.35e-06	2.57e-06	0.0190124
ggdef family	6.27e-06	5.03e-06	0.0192206
permease protein	0.000148497	0.00015646	0.01941
Required for 40S ribosome biogenesis. In(...)_5236	8.16e-06	3.6e-06	0.0195214
YcaO-like family	1.18e-06	4.54e-07	0.0195324
Uncharacterised protein family (UPF0236)	2.98e-07	6.93e-08	0.0195435
Methylates ribosomal protein L11 (By similarity)	0.00017102	0.000186547	0.0196674
Protein of unknown function (DUF1470)	6.84e-06	8.11e-06	0.0197694
K07001 NTE family protein	0.000342113	0.000333236	0.019871
Protein of unknown function (DUF3225)	1.93e-05	1.7e-05	0.0199512
Flagellar FliJ protein	1.79e-06	9.8e-07	0.0201464
Protein of unknown function (DUF2803)	0	6.94e-07	0.0202849
methyl-accepting chemotaxis sensory transducer	4.4e-07	2.15e-07	0.0203924
Histidine kinase	0.0140522	0.0145149	0.0204035
Protein of unknown function (DUF2393)	1.75e-06	4.11e-06	0.0205193
P-ring formation protein FlgA	9.36e-07	1.71e-07	0.020588
Ankyrin Repeat	0.000175803	0.000184298	0.0207413
homocysteine S-methyltransferase activity	0.00068499	0.000722273	0.0209775
alpha helical protein	1.13e-06	3.55e-07	0.0211603
Carboxysome Shell Carbonic Anhydrase	1.96e-06	1.06e-06	0.0215675
Isocitrate dehydrogenase	0.000107189	0.000131717	0.0216034
Glycogen debranching enzyme	0.000521648	0.000630993	0.0216675
protein with cbs domains	1.26e-05	9.52e-06	0.0217259
SMC domain protein	2.99e-05	2.81e-05	0.02176
Uncharacterised ArCR, COG2043	1.75e-05	1.51e-05	0.0218239
Crea protein	3.18e-05	2.66e-05	0.0218767
VanZ like protein	1.58e-06	4.94e-07	0.0218878
pyridoxamine 5_-phosphate oxidase-relate(...)_8800	7.63e-07	4.1e-07	0.0219559
Uroporphyrinogen decarboxylase	4.36e-06	7.83e-06	0.0219889
Hemerythrin HHE cation binding domain protein	4.85e-06	3.05e-06	0.0220251
Protein of unknown function (DUF1109)	1.94e-05	1.7e-05	0.0220361
4-methyl-5-beta-hydroxyethylthiazole kinase	1.35e-05	1.72e-05	0.0220573
Terminase, large subunit	1.73e-05	1.19e-05	0.0221809
photosystem II stability assembly factor-like protein	4.17e-06	3.44e-06	0.0222606
Fe-S-cluster oxidoreductase	6.05e-05	5.04e-05	0.0222716
heparinase II III family protein	0.00014692	0.000163283	0.0222826
Protein of unknown function, DUF488	3.17e-06	4.41e-06	0.0223862
Protein of unknown function (DUF616)	7.37e-07	6.35e-08	0.0224423
PAS PAC sensor protein	2.41e-05	1.88e-05	0.0224534
Sporulation	1.36e-06	6.48e-07	0.022498
CBS domain containing membrane protein	2.45e-07	3.2e-08	0.022509
Retrotransposon protein	0.000894325	0.000793978	0.02252
Specifically deglycosylates the denature(...)_5580	7.54e-07	6.48e-08	0.022656
ribonuclease M5 activity	4.27e-06	2.39e-06	0.022667
Threonine dehydratase	0.000517336	0.000537712	0.0227144
RNA polymerase sigma	3.19e-07	5.46e-08	0.0227372
membrane	0.00138091	0.00144024	0.02282
Mannosyltransferase (PIG-V))	3.74e-06	6.23e-06	0.0228432
Binds to cpn60 in the presence of Mg-ATP(...)_760	0.000289813	0.000301787	0.0229592
resistance transporter, Bcr CflA	1.75e-06	6.69e-07	0.0231673
50S ribosomal protein L3-2	1.14e-05	7.86e-06	0.0232303
Responsible for synthesis of pseudouridi(...)_5272	6.76e-06	3.64e-06	0.0232855
Carbohydrate-selective porin OprB	2.69e-05	2.22e-05	0.0233878
Sporulation domain protein	1.55e-05	1.37e-05	0.0235363
containing PIN domain	3.63e-07	8.16e-08	0.0236353
gamma-BHC dehydrochlorinase	2.39e-05	1.86e-05	0.0236888
Nitrilase cyanide hydratase and apolipop(...)_3457	4.44e-06	6.67e-06	0.0237328
CHASE3 domain	4.22e-05	4.79e-05	0.0238213
Integral membrane protein (MviN	0.00025528	0.000271199	0.0238455
solute carrier family 18 (Vesicular	2.98e-07	7.76e-07	0.0238938
acyl carrier protein	1.95e-05	1.42e-05	0.0239683
cell differentiation protein Rcd1	0	1.96e-07	0.0239894
SEL1	2.59e-07	0	0.0240215
Catalyzes the reversible phosphatidyl gr(...)_1102	0.00053222	0.000599433	0.0240325
NPCBM_NEW2 domain	9.65e-08	5.21e-07	0.0242836
butanediol catabolic process	0	1.56e-07	0.0243691
K07214 enterochelin esterase and related enzymes	4.9e-05	5.56e-05	0.0244494
Trehalose synthase	0.000212382	0.000277339	0.0245432
Domain of unknown function (DUF1857)	3.05e-06	7.07e-07	0.0246012
GTP cyclohydrolase i	0.000242328	0.000257106	0.0246725
Bacterial protein of unknown function (DUF934)	1.59e-05	1.19e-05	0.0247344
uroporphyrin-III c-methyltransferase	2.54e-05	3e-05	0.0247894
Pfam:DUF1008	4.77e-06	2.83e-06	0.0248718
RecB family nuclease	5.2e-05	6.19e-05	0.0248828
(ABC) transporter	0.0182666	0.0188267	0.0249042
40s ribosomal protein s6	8.14e-06	3.7e-06	0.024982
Transglycosylase-associated protein	0.000120342	0.000140821	0.0251502
Amino acid permease-associated region	1.23e-07	4.06e-07	0.0251963
4-alpha-glucanotransferase	0.000175041	0.000211999	0.0252834
Dinitrogenase iron-molybdenum cofactor biosynthesis protein	1.85e-06	9.02e-07	0.0253916
Carboxylesterase	0.000272424	0.000224586	0.0254579
ATP-binding cassette, sub-family E	1.11e-05	5.93e-06	0.0255639
asparagine synthetase	0.0005107	0.000583994	0.0255881
DNA-directed RNA polymerase, omega subunit	1.76e-06	1.19e-06	0.0256213
Excinuclease ABC C subunit domain protein	2.66e-05	3.44e-05	0.0257341
Catalyzes the CTP-dependent phosphorylat(...)_971	8.44e-06	3.85e-06	0.0257569
fic family	5.17e-06	3.55e-06	0.0257679
Transporter Drug Metabolite Exporter family	6.52e-06	5.07e-06	0.0258928
30s ribosomal protein S16	0.000203895	0.000212244	0.0260243
Methanesulfonate monooxygenase, hydroxylase beta subunit	3e-06	2.24e-06	0.0261506
protein ExbD TolR	1.56e-05	1.09e-05	0.0261957
Catalyzes the transfer of pyrophosphate (...)_1126	4.11e-06	2.69e-06	0.0262272
small nuclear ribonucleoprotein	9.7e-06	4.76e-06	0.0263009
paraoxonase	1.41e-06	3.68e-07	0.026345
DNA replication	1.65e-05	7.36e-06	0.026356
Gluconate 2-dehydrogenase	1.25e-05	1.56e-05	0.0263876
Dehydrogenase reductase	0.00207544	0.00200784	0.0264556
Catalyzes the conversion of 6-carboxy-5,(...)_1010	0.00012829	0.000117688	0.0265426
Domain of unknown function DUF302	4.19e-06	2.84e-06	0.0265865
ribonuclease BN	0.00030233	0.000342989	0.0267745
peptidase M15A	2.65e-06	1.57e-06	0.0269547
UPF0283 membrane protein	1.73e-05	1.32e-05	0.0269789
phospholipase Carboxylesterase	8e-05	8.66e-05	0.027046
Exchanges the guanine residue with 7-cya(...)_2007	7.48e-06	3.76e-06	0.0270793
Cytidyltransferase-related domain protein	3.07e-06	1.53e-06	0.0271122
Ohcu decarboxylase	8.54e-06	1.13e-05	0.0272482
peptidase, M20	2.87e-06	1.4e-06	0.0274376
Nucleolar protein	7.25e-06	3.74e-06	0.0274816
Catalyzes the 2-thiolation of uridine at(...)_960	0.000265293	0.000278468	0.0274926
NHL repeat-containing protein	1.37e-05	8.86e-06	0.0275036
Catalyzes the reversible formation of ac(...)_1097	0.000210719	0.000217863	0.0276707
tricarboxylate transport protein TctB	2.36e-06	3.38e-07	0.0277652
O-methyltransferase	0.000144742	0.000137625	0.0278125
iroN-sulfur cluster-binding protein	1.74e-07	6.93e-07	0.0279766
Phosphate transport regulator	0.000148785	0.000156743	0.0280673
phosphoglucomutase	0.000106054	9.47e-05	0.0281836
Converts alpha-N-acetylneuranimic acid ((...)_1373	7.05e-06	9.84e-06	0.0282532
outer membrane protein PgaA	1.14e-07	4.25e-07	0.028391
UDP-N-acetylglucosamine 2-epimerase	0.000186241	0.000197974	0.0284138
Precorrin-8x methylmutase	1.93e-05	1.37e-05	0.0284248
YhhN domain-containing protein	4.84e-06	3.34e-06	0.028481
Sulfotransferase	3.52e-05	2.79e-05	0.028492
Insecticidal toxin complex protein	1.86e-05	2.74e-05	0.0285466
diphthamide biosynthesis protein	7.91e-06	4.19e-06	0.0289152
Transforms N(2)-succinylglutamate into s(...)_6025	2.48e-07	7.2e-08	0.028967
GINS complex protein	2.21e-06	1.35e-06	0.0293164
Phenol degradation-like protein	8.37e-06	5.96e-06	0.0293275
Domain of unknown function (DUF1794)	7.79e-06	6.1e-06	0.0295045
Alginate biosynthesis protein Alg44	7.08e-07	1.41e-06	0.0295809
CheC --inhibitor of MCP methylation	2.28e-05	2.86e-05	0.0296452
Fe-S protein	5.72e-06	3.81e-06	0.0298011
Periplasmic ligand-binding sensor protein	6.7e-06	9.69e-06	0.0298222
CpcD	1.01e-07	0	0.0298332
thrombospondin type 3 repeat-containing protein	3.46e-06	1.26e-06	0.0299765
Collagen-like tail subunit (Single stran(...)_1308	0	1.99e-07	0.0300259
shikimate kinase	4.17e-06	1.91e-06	0.0300723
Family 2 glycosyl transferase	7.3e-06	9.13e-06	0.030188
Hydrogenase assembly chaperone hypC hupF	4.08e-07	9.65e-07	0.030253
Conjugative transposon TraN protein	3e-06	2.25e-06	0.0302744
Calpain family cysteine protease	1.13e-07	3.25e-07	0.0302854
short chain dehydrogenase	0.000117863	9.66e-05	0.0304279
Cytochrome c oxidase caa3 assembly factor (Caa3_CtaG)	1.41e-05	1.86e-05	0.0304389
AP endonuclease, family 2	1.78e-06	5.83e-07	0.0304984
Uncharacterised protein family (UPF0164)	2.69e-07	4.96e-08	0.030618
nucleoside 2-deoxyribosyltransferase YtoQ	4.54e-08	2.81e-07	0.0307543
outer membrane protein Omp28	5.99e-07	2.51e-07	0.0309827
Heparinase II_III-like protein	7.24e-06	8.76e-06	0.031224
UPF0282 protein	2.02e-06	9.06e-07	0.0312754
Pilus biogenesis CpaD protein (pilus_cpaD)	4e-07	4.97e-08	0.0313327
Part of a complex that catalyzes the rev(...)_3723	1.76e-06	6.56e-07	0.0313553
Component of the KaiABC clock protein co(...)_1317	1.88e-07	2.29e-08	0.0314343
Pfam:UPF0005	8.97e-08	4.3e-07	0.0315356
Permease for cytosine_purines, uracil, thiamine, allantoin	3.42e-06	1.27e-06	0.0315584
penicillin-binding protein	0.00124369	0.00130955	0.0316057
Ribosomal protein	7.44e-05	3.5e-05	0.0316962
Phage portal protein lambda family	2.76e-05	8.75e-06	0.0317072
Low temperature-induced protein	2.14e-07	0	0.0318563
Protein of unknown function DUF89	2.62e-06	1.17e-06	0.0318804
peptidase M10A and M12B, matrixin and adamalysin	3.57e-06	7.02e-06	0.0320832
OmpA MotB family outer membrane protein	4.82e-07	1.57e-07	0.0322282
Polynucleotide adenylyltransferase	2.24e-07	8.28e-07	0.0322612
DNA recombination	2.13e-06	3.93e-06	0.0323242
type I restriction-modification system R subunit	8.95e-05	6.94e-05	0.0323688
paraquat-inducible protein a	1.83e-05	2.18e-05	0.0324206
Hemerythrin hhe cation binding	9.8e-05	0.000112409	0.0324551
Pfam:DUF2086	2.56e-05	3.1e-05	0.0325017
bacilysin biosynthesis protein	0	1e-07	0.0325336
MreD protein	1.53e-06	2.49e-07	0.0325548
Stigma-specific protein, Stig1	4.54e-07	6.76e-07	0.0327132
Predicted membrane protein (DUF2070)	3.65e-06	1.38e-06	0.0328688
Diguanylate cyclase	0.000411605	0.00044461	0.0330572
Thiolesterase that catalyzes the hydroly(...)_5875	4.66e-05	4.03e-05	0.0331972
QueT transporter	2.01e-06	8.22e-07	0.0332406
Molecular chaperone capable of stabilizi(...)_3253	1.1e-05	5.41e-06	0.0333091
DNA-3-methyladenine glycosylase activity	0.000162954	0.000151844	0.0333201
phosphorylated adaptor for RNA export	1.12e-07	5.32e-07	0.0333412
small subunit (SSU) processome component, homolog	4.12e-06	2.15e-06	0.0333984
Hydrolyzes D-tyrosyl-tRNA(Tyr) into D-ty(...)_2654	4.4e-06	1.96e-06	0.0334212
sdia-regulated domain-containing protein	3.03e-05	1.39e-05	0.0334443
Photosystem I assembly related protein	5.2e-07	1.84e-06	0.0335038
Cyclin-Dependent Kinase	6.54e-07	2.96e-07	0.0335279
integrase regulator R	1.24e-07	3.6e-07	0.0335389
Prophage Lp2 protein 4	7.47e-07	9.64e-09	0.0335735
Could be involved in DNA repair (By similarity)	0.000274445	0.00030455	0.0337479
3D domain protein	3.95e-06	2.91e-06	0.0338775
Hemerythrin HHE cation binding domain	1.26e-05	1.71e-05	0.0339134
ABC transporter, ATP-binding protein	7.6e-06	4.35e-06	0.0339585
Citrate utilization protein b	2.44e-05	3.1e-05	0.0340641
mannose-sensitive agglutinin (MSHA) biogenesis protein MshP	8.99e-07	2.17e-06	0.0340987
Cbs domain	1.57e-06	2.68e-06	0.0342511
cobalamin (vitamin B12) biosynthesis CbiG protein	2.24e-05	1.96e-05	0.0344407
peptidase M42 family protein	1.75e-08	3.02e-07	0.0345827
Fructose-1,6-bisphosphatase	0.000142005	0.000150586	0.0346041
Hydrolyzes cAMP to 5_-AMP. Plays an impo(...)_2656	0.000330883	0.000354989	0.0347319
Tail fiber protein	5.6e-07	1.01e-06	0.0347897
Protein of unknown function (DUF424)	4.91e-06	2.37e-06	0.0348439
Has nucleotide phosphatase activity towa(...)_2538	4.42e-06	1.96e-06	0.0348802
Protein of unknown function (DUF2388)	2.34e-07	1.23e-06	0.0349279
May be involved in photosynthetic membra(...)_3112	6.14e-08	0	0.0349585
transcriptional regulator AsnC family	0.000407995	0.000350808	0.0349695
Single-stranded nucleic acid binding R3H(...)_5531	3.64e-05	4.26e-05	0.0350355
Magnesium or manganese-dependent protein phosphatase	2.45e-07	1.04e-07	0.0351356
sarcosine oxidase alpha subunit	3.68e-07	2.12e-08	0.0351685
Protein of unknown function (DUF1512)	5.83e-06	2.57e-06	0.0352038
Glycosyl transferase	3.88e-05	2.7e-05	0.0353213
ADP-ribosylation Crystallin J1	3.38e-05	3.94e-05	0.0354078
symporter activity	7.01e-05	5.76e-05	0.0355205
leucine rich repeat domain protein	7.96e-08	5.57e-09	0.0355419
Bacterial DNA-binding protein	5.63e-07	2.4e-08	0.0355997
D-amino acid dehydrogenase, small subunit	1.26e-06	1.8e-07	0.0358323
NIN1 RPN12 binding protein 1 homolog (S. cerevisiae)	3.59e-06	1.52e-06	0.0359487
Chromosome 9 open reading frame 64	4.47e-07	1.09e-06	0.036042
sphingolipid delta-4 desaturase activity	3.98e-06	3.46e-06	0.036053
Major vault protein	4.5e-06	2.85e-06	0.0361421
Cytidylyltransferase	2.49e-08	3.1e-07	0.0362853
Binds specifically to the SsrA RNA (tmRN(...)_755	0.000206892	0.000213871	0.0362963
Domain of unknown function (DUF1917)	1.89e-07	4.59e-07	0.036388
The UvrABC repair system catalyzes the r(...)_5833	0.00134476	0.00145131	0.0366286
padr family transcriptional regulator	2.4e-06	3.61e-06	0.0367707
zinc-finger protein	8.42e-05	7.29e-05	0.0367933
UPF0215 protein	3.84e-06	1.4e-06	0.0368511
Protein of Unknown function (DUF2784)	1.45e-05	1.72e-05	0.0368621
rna polymerase	0.00040978	0.000432555	0.0369189
Isochorismatase, hydrolase	5.81e-06	7.69e-06	0.0369299
Phosphoprotein phosphatase	1.2e-06	2.74e-07	0.036941
UV damage endonuclease	6.37e-06	7.85e-06	0.0372391
Positive regulator of sigma E, RseC MucC	1.8e-06	5.36e-07	0.0372754
Broad-specificity glycosaminoglycan lyase (By similarity)	1.05e-05	1.79e-05	0.0373083
Bifunctional protein that converts poly((...)_742	3.54e-06	4.94e-06	0.0373399
Pfam:DUF3204	1.97e-06	5.73e-07	0.0377785
Curli production assembly transport component CsgG	3.28e-05	2.84e-05	0.0378011
Protein of unknown function (DUF1044)	3.92e-06	2.36e-06	0.037959
30S ribosomal protein S27Ae	6.29e-06	3.16e-06	0.0380234
chlorosome envelope protein	1.49e-07	8.2e-07	0.0380344
Protein of unknown function (DUF552)	7.63e-06	3.6e-06	0.0383528
Phospholipase D endonuclease domain-containing protein	2.47e-06	1.69e-06	0.0384126
Stabilizes TBP binding to an archaeal bo(...)_5626	3.32e-05	1.64e-05	0.0384498
pre-rRNA processing protein involved in (...)_8689	6.63e-06	3.23e-06	0.038624
NUDIX hydrolase	5.24e-05	6.29e-05	0.0387305
Catalyzes the transfer of an acetyl grou(...)_1123	1.2e-05	1.48e-05	0.0387746
DNA methylase n-4 n-6 domain protein	0.000336454	0.000306028	0.038889
GMC oxidoreductase	1.94e-06	3.87e-06	0.0389
Proprotein convertase P-domain	3.22e-08	1.38e-07	0.0390459
macrophage migration inhibitory factor	6.49e-07	1.13e-06	0.0390879
YceI family	3.72e-06	6.77e-06	0.0391524
flavoprotein	5.47e-06	2.92e-06	0.0391635
Uncharacterized protein conserved in bacteria (DUF2194)	7.88e-07	3.05e-07	0.0392303
Specifically methylates the N7 position (...)_5586	0.000140265	0.000132705	0.0392515
negative regulation of growth	6.23e-05	5.05e-05	0.0392934
Sjogrens syndrome scleroderma autoantigen 1	4.25e-06	1.85e-06	0.0394101
FHA	1.59e-05	1.92e-05	0.0394755
This is one of the two reaction center p(...)_5886	1.98e-06	6.88e-07	0.0397723
Immunoreactive 84 kDa antigen	1.35e-05	8.56e-06	0.0398597
CDGSH-type	0	3.74e-07	0.0399014
Protein of unknown function (DUF3253)	3.88e-06	2.31e-06	0.0399789
Carbohydrate-binding module 48 (Isoamyla(...)_928	2.42e-06	1.13e-06	0.0401185
SPFH domain _ Band 7 family	8.64e-06	5.93e-06	0.040153
ATP-grasp superfamily	7.42e-06	3.99e-06	0.040164
Sulphur oxidation protein SoxZ	1.66e-06	1.29e-07	0.040175
Protein of unknown function (DUF2480)	1.29e-05	1.1e-05	0.0401965
Domain of unknown function (DUF932)	2.75e-05	8.32e-06	0.040218
Pfam:DUF1089	1.27e-05	1.63e-05	0.040229
Catalyzes the formation of the alpha-1,6(...)_1052	0.000440229	0.000502026	0.0402616
Endonuclease that specifically degrades (...)_1968	0.000200609	0.000190933	0.0402821
type II secretion system protein	5.84e-05	4.32e-05	0.0403866
ABC transporter (permease)	0.00364584	0.00385458	0.0403976
Uncharacterized protein conserved in bacteria (DUF2255)	6.48e-07	8.9e-08	0.0404188
Transcriptional regulator, MarR Family	9.87e-05	0.000107201	0.0404298
nuclear export factor gle1	3.02e-05	2.5e-05	0.0404853
The beta subunit is responsible for the (...)_5836	0.000368535	0.000355479	0.0405422
Domain of unknown function (DUF1851)	2.09e-06	9.99e-07	0.0405654
Extracellular solute-binding protein, family 5	0.000911652	0.000967589	0.0406088
K01470 creatinine amidohydrolase EC 3.5.2.10	0.000147666	0.00015508	0.040642
glycoside hydrolase family 4	9.02e-05	9.99e-05	0.0407885
Protein of unknown function (DUF2743)	1.77e-07	3.21e-07	0.0408202
Membrane protein, conserved	0	1.35e-07	0.0408444
family UPF0324	1.87e-05	2.29e-05	0.0408554
Exopolysaccharide synthesis, ExoD	1.02e-06	4.19e-07	0.0410231
Sigma 54 modulation protein	7.12e-08	4.98e-07	0.0410564
Aminoglycoside phosphotransferase	0.000387258	0.000371683	0.0410923
Transaldolase is important for the balan(...)_5959	0.000347231	0.000376481	0.0411033
Peptidase M15B and M15C DD-carboxypeptidase VanY, endolysin	3.17e-06	4.55e-06	0.0411469
wd repeat	8.74e-05	7.85e-05	0.0411674
Binds to the 60S ribosomal subunit and p(...)_762	6.26e-06	3.28e-06	0.0412428
Protein of unknown function (DUF2497)	2.52e-05	2e-05	0.0413745
Protein of unknown function (DUF1018)	9.11e-07	6.65e-07	0.0414368
Specifically methylates the adenine in p(...)_5588	4.32e-05	3.66e-05	0.0414932
Transposase	0.00133783	0.00117907	0.0415146
tripeptidyl aminopeptidase	1.71e-06	5.58e-07	0.0415704
HTH_CRP	1.68e-07	7.53e-07	0.0417481
Mandelate racemase muconate lactonizing protein	1.85e-05	2.56e-05	0.0418573
Protein of unknown function (DUF1698)	7.95e-07	1.63e-06	0.041915
PbH1	8.65e-05	9.99e-05	0.0419715
Putative addiction module component	1.59e-05	1.15e-05	0.0420042
Short-chain dehydrogenase reductase Sdr	0.00121109	0.00126541	0.0421947
FAD binding domain	2.48e-06	1.43e-06	0.0422058
hydrolase, family 25	5.18e-05	3.96e-05	0.0422168
that is required for full activity and s(...)_9225	6.18e-06	3.65e-06	0.0422939
General (non sugar-specific) component o(...)_2317	0.000174651	0.000191234	0.0423049
methyltransferase, small	3.46e-07	9.74e-08	0.0424026
Carboxymuconolactone decarboxylase family	4.48e-06	1.72e-06	0.0424472
WD40 domain protein beta Propeller	1.08e-05	1.43e-05	0.0424817
Protein arginine n-methyltransferase	1.22e-05	1.57e-05	0.0428009
S-adenosyl-l-methionine hydroxide adenosyltransferase	2.87e-06	4.41e-06	0.0428796
TMV resistance protein N-like	2.21e-07	0	0.0429727
Domain of Unknown Function (DUF349)	1.5e-05	1.79e-05	0.0430739
2_-5_ rna ligase	9.47e-05	0.000104158	0.0430849
DNA-(Apurinic or apyrimidinic site) lyase (EC 4.2.99.18)	2.78e-06	1.64e-06	0.0431424
but it may be involved in stabilization (...)_6923	2.16e-06	6.1e-07	0.0431866
DNA-directed DNA polymerase, B	1.73e-06	4.92e-07	0.04329
MULE transposase, conserved domain	1.69e-06	2.63e-06	0.043301
Carbohydratebinding protein	8.55e-07	1.57e-06	0.043345
ATPase (type	0	1.99e-07	0.0434803
cell division cycle 40 homolog (S. cerevisiae)	3.85e-07	5.77e-08	0.0436269
NADP oxidoreductase coenzyme F420-dependent	2.5e-05	2.15e-05	0.0436921
UPF0397 protein	1.78e-06	4.07e-07	0.0437702
Triose-phosphate Transporter family	1.17e-07	5.81e-07	0.0438932
Homoserine O-transsuccinylase	3.13e-05	2.63e-05	0.0439042
Transcription regulator	4.24e-06	2.41e-06	0.0439847
Mannosyltransferase	8.15e-06	6.02e-06	0.0439957
Uncharacterized ACR, COG1399	4.5e-05	5.02e-05	0.0440067
Domain of unknown function (DUF385)	5.98e-05	7.14e-05	0.0441811
DNA-directed RNA polymerase, subunit e_	4.47e-06	1.95e-06	0.0442595
outer membrane lipoprotein carrier protein LolA	1.17e-05	8.53e-06	0.0443973
heptaprenyl diphosphate synthase component I	2.16e-06	7.38e-07	0.0444214
50s ribosomal protein L28	0.000146882	0.000154673	0.0444561
DNA-binding helix-turn-helix protein	2.03e-05	1.42e-06	0.0445125
Required, probably indirectly, for the h(...)_5254	0.000398872	0.00041884	0.0445366
Protein of unknown function (DUF3185)	7.19e-06	5.41e-06	0.0445476
Sarcosine oxidase, gamma subunit	2.2e-05	1.51e-05	0.0446291
Uncharacterised protein family (UPF0227)	8.53e-06	1.22e-05	0.044708
hydrolase family 65	4.57e-05	5.93e-05	0.0447531
eight transmembrane protein EpsH	4.06e-05	4.76e-05	0.0451875
atp-dependent nuclease subunit	2.04e-05	2.57e-05	0.0453018
Protein of unknown function (DUF1275)	2.01e-07	4.37e-07	0.0453232
Protein of unknown function (DUF2591)	1.69e-07	3.24e-08	0.0453342
Dolichyl-phosphate-mannose-protein mannosyltransferase	7.88e-06	6.51e-06	0.0453452
Virulence-associated protein VapB-like protein	5.61e-07	1.55e-06	0.0453788
Acyl carrier protein	1.71e-05	2.12e-05	0.045568
type I restriction-modification system	0.000195055	0.000173723	0.0458266
Filamentation induced by cAMP protein fic	0.000122666	0.000110023	0.0458376
Domain of unknown function (DUF1924)	1.36e-06	7.54e-07	0.0458945
family 28	2.67e-07	7.49e-07	0.0459176
UPF0441 protein	1.53e-06	6.31e-07	0.045939
3-Oxoacyl-[acyl-carrier-protein (ACP)] synthase III	6.97e-07	1.52e-06	0.0461512
Inner membrane protein YkgB	4.22e-06	5.95e-06	0.046174
Transcriptional repressor, CopY family	8.41e-06	6.29e-06	0.0463245
Converts stearoyl-ACP to oleoyl-ACP by i(...)_1378	2.28e-05	2.64e-05	0.0464271
CHASE2	1.14e-06	7.77e-07	0.0464592
pdp protein	2.1e-05	1.79e-05	0.0464702
male sterility	2.24e-06	3.83e-06	0.0465032
repeat domain protein	1.94e-06	4.23e-06	0.0465506
Pfam:DUF304	1.94e-05	2.45e-05	0.046572
Hydrolase, NUDIX family	6.84e-07	1.15e-06	0.0465931
Polysaccharide pyruvyl transferase	3.39e-05	4.44e-05	0.0467603
Nucleotidyltransferase domain protein	6.54e-07	1.24e-06	0.0467933
Enzyme of the cupin superfamily	3.42e-05	2.41e-05	0.047065
START domain	7.14e-08	3.39e-07	0.047149
Domain of unknown function (DUF336)	6.59e-05	7.49e-05	0.04716
Esterase	6.63e-05	7.49e-05	0.0472384
Cell wall binding repeat 2-containing protein	1.68e-05	2.74e-05	0.0473199
Ion transport 2 domain-containing protein	9.31e-06	1.06e-05	0.047483
VWA-like domain (DUF2201)	5.96e-06	7.85e-06	0.0476712
abortive phage infection	9.7e-06	6.65e-06	0.0476927
Domain of unknown function (DUF371)	5.01e-06	1.76e-06	0.0477346
Glycoside Hydrolase Family 43	4.94e-06	8.54e-06	0.0477952
Sulfolipid biosynthesis protein	1.54e-06	1.06e-06	0.0480475
(1,4)-alpha-D-glucan 1-alpha-D-glucosylmutase activity	0.0001566	0.000203751	0.0480585
Aspartyl Asparaginyl beta-hydroxylase	5.98e-06	7.01e-06	0.0480914
Removes the pyruvyl group from chorismat(...)_5220	7.41e-06	5.46e-06	0.0481691
Allows the formation of correctly charge(...)_473	1.09e-05	5.93e-06	0.0481801
catalyzes amidations at positions B, D, (...)_6977	4.99e-05	4.47e-05	0.0483283
flagellar protein flgJ	1.16e-06	3.24e-07	0.048489
HTTM domain-containing protein	1.36e-07	0	0.0485644
anti-anti-sigma	1.26e-05	8.96e-06	0.0486399
Transcription factor that plays a role i(...)_5966	7.88e-06	4.18e-06	0.0486908
Phosphorylase, family	2.02e-06	1.11e-06	0.0487018
Protein of unknown function (DUF1643)	2.31e-05	7.46e-06	0.0487335
Zn-finger in ubiquitin-hydrolases and other protein	1.07e-06	3.32e-06	0.0487576
diacylglycerol O-acyltransferase activity	1.29e-06	2.06e-06	0.0487804
Specifically catalyzes the AdoMet-depend(...)_5575	6.64e-06	3.26e-06	0.048812
Part of a complex that catalyzes the for(...)_3721	1.61e-06	6.35e-07	0.0489088
Zonular occludens toxin	6.57e-07	1.66e-07	0.0491027
Ferredoxin	0.000347438	0.000319843	0.0492019
Plasmid maintenance system antidote protein	9.26e-05	8.11e-05	0.0492129
Restriction modification system DNA (Specificity	6.13e-05	4.51e-05	0.0493831
Integrase core domain	1.09e-05	7.68e-06	0.0493941
PAS domain	3.14e-05	2.71e-05	0.0494313
HpcH HpaI aldolase	8.16e-06	1.09e-05	0.0495528
Protein of unknown function (DUF2974)	8.36e-08	2.77e-07	0.0496586
Glycosyl hydrolase family 26	3.88e-07	9.29e-07	0.04968
Regulates arginine biosynthesis genes (By similarity)	4.76e-05	5.43e-05	0.0497254
Catalyzes the reductive cleavage of azo (...)_1093	2.83e-05	3.43e-05	0.0499045
Fibronectin-binding A domain protein	1.66e-05	1.25e-05	0.0499664
solute carrier family 4	5.48e-07	9.83e-07	0.0499774
BlaR1 peptidase M56	1.36e-05	1.68e-05	0.0499884
alpha-l-glutamate ligase-like protein	1.31e-05	1.2e-05	0.0499994

## Sheet: Data S2 DD VS CD
EggNOG category	mean(CD)	mean(DD)	P value
phosphate ABC transporter (Permease	1.21e-05	9.1e-06	0.000204373
CHAD domain containing protein	1.19e-05	9.94e-06	0.000237117
GHMP kinase	1.87e-06	7.4e-07	0.000301725
2-hydroxyglutaryl-CoA dehydratase, D-component	1.28e-05	9.52e-06	0.000312054
Receptor	9.41e-05	8.05e-05	0.000332381
F-box protein	3.3e-06	1.04e-06	0.00034271
MotA_TolQ_ExbB proton channel family	3.96e-06	2.43e-06	0.000571146
tyrosinase	6.18e-06	2.36e-06	0.000602791
Formylmethanofuran dehydrogenase subunit E	6.92e-06	9.57e-06	0.000669047
photosystem i assembly btpa	1.74e-05	1.34e-05	0.000723767
ProFAR isomerase	1.77e-06	4.83e-07	0.000756291
Recombinase	7.53e-07	1.41e-06	0.000865949
DUF1295 domain protein	4.5e-05	3.97e-05	0.00090968
Capsule polysaccharide biosynthesis protein	2.81e-05	2.32e-05	0.00118514
Phage-related baseplate assembly protein	1.09e-05	7.8e-06	0.00136205
bacteriophage DNA transposition B protein	6.1e-07	1.32e-07	0.00142589
Domain of unknown function (DUF1857)	1.61e-06	3.05e-06	0.00160565
Sulfate ABC transporter periplasmic sulfate-binding protein	0.000100477	8.96e-05	0.00161598
Bacterial extracellular solute-binding p(...)_666	0.000136673	0.000120275	0.0016263
protein containing tetratricopeptide repeat	1.14e-05	1.54e-05	0.00163663
ANTAR domain	1.18e-06	7.02e-07	0.00172113
Sulfotransferase	2.53e-05	2.03e-05	0.00182079
Glutathione S-transferase	8.82e-07	2.23e-06	0.00184287
diacylglycerol kinase, catalytic region	1.38e-05	1.15e-05	0.00187364
cytochrome c-type biogenesis protein CcmB	5.39e-07	9.26e-07	0.00192825
Glycosyltransferase family 28 C-terminal domain	5.62e-07	1.01e-07	0.00215416
arginine N-methyltransferase 2	2.79e-07	5.74e-08	0.0021846
Pfam:DUF1994	1.77e-06	6.24e-07	0.00235897
Metalloprotease, specifically cleaves on(...)_3179	3.76e-06	2.18e-06	0.0023793
tetratricopeptide repeat domain	8.62e-05	7.08e-05	0.00240007
Protein of unknown function (DUF1007)	2.49e-07	2.28e-08	0.00245621
Pfam:PGAM	4.99e-07	1.34e-06	0.00255708
Naphthoate synthase	0.000102745	0.000120148	0.00256741
Cycloeucalenol	1.26e-07	5.05e-07	0.00270619
phosphate-induced protein 1 conserved re(...)_8538	5.79e-06	1.04e-05	0.00279365
Lantibiotic dehydratase, C terminus	7.39e-06	4.58e-06	0.00296824
Pyruvoyl-dependent arginine decarboxylase (PvlArgDC)	1.56e-06	9.67e-07	0.00306867
ethyl tert-butyl ether degradation	1.56e-06	1.01e-06	0.00311043
sulfur oxidation protein soxY	1.15e-05	1.46e-05	0.00313251
Transport energizing protein, ExbD TolR family	1.55e-06	5.24e-07	0.00315372
Uncharacterized conserved protein (DUF2161)	6.28e-06	7.25e-06	0.00316405
Predicted permease	5.9e-05	7.35e-05	0.00324349
sulfate transporter antisigma-factor antagonist stas	1.54e-06	8.29e-07	0.00327667
Uncharacterized conserved protein (DUF2294)	7.74e-06	4.8e-06	0.003287
Sarcosine oxidase (Beta subunit)	6.42e-05	5.21e-05	0.00330733
PBS lyase HEAT-like repeat domain protein	7.07e-08	1.41e-06	0.00332941
CRISPR-associated protein cas2	2.27e-06	8.65e-07	0.00338117
Alanine rich lipoprotein lppW	1.1e-07	4.74e-07	0.00344512
Cbb3-type cytochrome oxidase component	5.96e-06	9.18e-06	0.00346709
polyamine binding	0.000200731	0.000168618	0.00350071
serine threonine-protein phosphatase	0.000285315	0.000267126	0.00366476
Functions as a ribosomal silencing facto(...)_2246	0.000183718	0.000173677	0.00378475
Cytochrome c	4.99e-05	6.08e-05	0.00394198
Phage-Associated Protein	7.83e-06	3.14e-06	0.00402033
The B protein acts as a regulator of ele(...)_5829	2.56e-08	2.04e-07	0.00415108
preprotein translocase, yajc subunit	0.000152499	0.000167333	0.00424547
biogenesis protein, MshI	8.71e-06	1.4e-05	0.00432139
replication factor A complex, RPA14 subunit	9.83e-08	0	0.00436589
Uroporphyrinogen decarboxylase (URO-D)	1.66e-05	2.66e-05	0.00441149
Acetyl-CoA hydrolase	0.00013042	0.000148729	0.00443358
peptidylprolyl cistrans isomerase	0.000128077	0.000139255	0.00446478
Osmoprotectant transport system permease protein	2.17e-06	9.78e-07	0.00449753
coA-substrate-specific enzyme activase	0.000136072	0.000181533	0.00450786
Phosphoenolpyruvate-dependent sugar phos(...)_4092	3.04e-06	6.11e-06	0.00451819
IS4 family Transposase	3.99e-06	2.75e-06	0.00453939
transporter substrate-binding protein	4.07e-06	2.35e-06	0.00476189
Uncharacterized protein conserved in bacteria (DUF2237)	2.68e-05	3.3e-05	0.00516185
TraT complement resistance	1.85e-06	9.15e-07	0.00517218
hemerythrin hhe cation binding	2.61e-05	3.38e-05	0.00519295
anaerobic glycerol-3-phosphate dehydrogenase, subunit B	2.98e-06	4.63e-06	0.00520327
Phage portal protein	1.12e-06	4.74e-07	0.00529173
Oligopeptide dipeptide ABC transporter p(...)_3540	1.52e-05	1.13e-05	0.00543446
biotin lipoate A B protein ligase	2.24e-06	4.13e-06	0.0055094
NADH-ubiquinone_plastoquinone oxidoreductase chain 6	2.88e-06	1.44e-06	0.00553214
sulfate abc transporter	8.66e-05	7.91e-05	0.00564378
solute carrier family 35 member	6.54e-08	3.58e-07	0.00567586
smc domain-containing protein	7.81e-07	2.88e-07	0.00575091
transporter activity	0.000756641	0.000701759	0.00587628
tail collar domain protein	5.4e-05	4.1e-05	0.00606164
molybdopterin-guanine dinucleotide biosy(...)_8179	1.79e-05	1.42e-05	0.0062069
Protein of unknown function (DUF2945)	3.52e-05	4.6e-05	0.00622811
4fe-4s ferredoxin, iron-sulfur binding	2.35e-06	3.71e-06	0.0063015
autotransporter beta-domain protein	1.23e-05	1.04e-05	0.00638754
Conjugal transfer protein	2.36e-05	1.42e-05	0.00650082
Domain of unknown function DUF77	1.27e-05	1.69e-05	0.0065228
Phospholipase	3.16e-05	3.83e-05	0.00653313
phosphatidylinositol transfer protein	6.34e-07	1.35e-06	0.00656488
Putrescine ABC transporter, permease	7.38e-06	5.52e-06	0.00658521
Cbb3-type cytochrome oxidase component FixQ	1.89e-06	5.05e-06	0.0066073
Protein of unknown function (DUF2550)	2.16e-08	3.46e-07	0.00663004
cathepsin	3.32e-05	2.96e-05	0.00664037
Protein of unknown function (DUF3568)	7.37e-07	2.75e-06	0.00667125
methyltransferase type	5.68e-06	3.78e-06	0.00668157
fibronectin type iii	1.77e-08	2.5e-07	0.0067264
Major facilitator superfamily domain containing 4	0	9.64e-08	0.00673673
Late embryogenesis abundant protein	6.84e-07	1.87e-06	0.0067898
Involved in the biosynthesis of the arab(...)_2789	1.51e-07	4.15e-07	0.00695792
Membrane Fusion Protein	5.64e-06	4.7e-06	0.00697879
Pyridine nucleotide-disulphide oxidoreductase	6.02e-07	9.85e-07	0.00708966
chloramphenicol	5.47e-06	3.29e-06	0.00711087
system, protein	0.000149448	0.000118982	0.00713119
transcriptional regulator, luxR family	4.83e-06	2.79e-06	0.00734106
Multidrug resistance protein D	3.59e-07	1.27e-07	0.00737227
Protein of unknown function (DUF507)	1.01e-05	1.32e-05	0.00738259
antirestriction protein	3.41e-05	2.37e-05	0.00744808
Transcriptional regulator, gntR family	0.000303882	0.000272655	0.00746929
glycosyl transferase, family 9	7.2e-06	5.37e-06	0.00753609
group 1 glycosyl transferase	3.34e-05	2.87e-05	0.00755686
Protein of unknown function (DUF2274)	2.13e-06	8.87e-07	0.00767059
Glycine betaine	0.000119909	8.79e-05	0.00777398
WD40 repeat protein	6.38e-06	4.25e-06	0.00778431
poly(3-hydroxyalkanoate) depolymerase	2.81e-06	1.11e-06	0.00781749
Peptidase m56	3.47e-05	2.95e-05	0.00783782
Protein of unknown function (DUF3308)	3.68e-07	9.39e-07	0.00791331
Methane monooxygenase	1.78e-08	1.08e-07	0.00796781
family UPF0324	2.23e-05	3.02e-05	0.00806736
Protein containing tetratricopeptide repeats	8.4e-06	5.45e-06	0.00829074
Thioredoxin	0.00125392	0.00129795	0.00830107
cell wall assembly cell proliferation coordinating protein	1.25e-06	5.06e-07	0.00840303
TRAP-T family transporter, DctP (Peripla(...)_5759	4.79e-06	2.72e-06	0.00853928
Mg2 transport protein CorA	1.21e-05	7.31e-06	0.00855961
Protein of unknown function (DUF3186)	3.39e-08	2.29e-07	0.00856994
cytochrome C family protein	0.000327978	0.000384061	0.00859202
Family 2 glycosyl transferase	8.93e-06	7.12e-06	0.00868751
Transposase of ISThsp10, IS21 family, C (...)_6073	2.97e-07	6.96e-07	0.00870827
CAMP-dependent protein kinase, catalytic subunit	6.51e-07	4.08e-08	0.0087186
tir protein	1.49e-05	8.5e-06	0.00876112
cellulose synthesis protein	0	7.53e-08	0.00880376
type ii secretion system protein e	0.00090906	0.000966986	0.00886771
inner membrane protein yohC	1.03e-05	1.53e-05	0.00894308
Domain of unknown function DUF20	4.85e-05	4.19e-05	0.00902055
sarcosine oxidase delta subunit	1.71e-05	1.34e-05	0.00908439
chromosome 1 open reading frame 53	0	2.19e-07	0.00909471
Zinc dependent phospholipase C	4.73e-06	2.04e-06	0.00917262
auxin efflux carrier	5e-06	6.75e-06	0.00921635
ATP-binding region, ATPase domain protein	2.55e-05	3.11e-05	0.00930173
twitching motility protein	0.000648158	0.000694544	0.00934546
Inner membrane protein YebE	8.56e-06	6e-06	0.00952456
Hopanoid biosynthesis associated RND tra(...)_2621	6.6e-05	8.19e-05	0.00953489
Lysyl Oxidase	1.25e-07	1.85e-08	0.00979222
Cyclic nucleotide-binding protein	4.02e-05	5.03e-05	0.00983299
Protein of unknown function (DUF1207)	5.48e-06	3.01e-06	0.00990715
ER degradation enhancer, mannosidase alpha-like	1.82e-06	2.89e-06	0.00992748
thioesterase	9.6e-05	0.000111483	0.00993781
Part of a sulfur-relay system (By similarity)	2.86e-05	4e-05	0.00998275
glycosyl hydrolase family 32 domain protein	4.41e-06	6.7e-06	0.0100136
transfer protein trbJ	9.03e-06	5.28e-06	0.0101125
lipid transport	0.00045291	0.00049593	0.0102138
membrane protein, MmpS	9.91e-08	3e-07	0.0102657
YqcI_YcgG family	1.37e-05	1.11e-05	0.0102884
TraE protein	2.72e-06	1.27e-06	0.0104112
AAA-4 family	7.71e-06	5.12e-06	0.0104463
Inducible Bartonella autotransporter	3.63e-08	1.84e-07	0.0105737
MJ0042 family finger-like domain protein	9.22e-08	0	0.0105964
haemagglutination activity domain	1.96e-06	9.4e-07	0.0107732
Calcium binding protein	1.21e-06	2.68e-06	0.0108053
PGAM	1.37e-06	2.36e-06	0.0109399
DsrE_DsrF-like family	8.88e-05	0.00010087	0.0109842
csbd family	6.79e-06	1.07e-05	0.0110385
Protein of unknown function (DUF1614)	5.67e-06	7.8e-06	0.0110705
Hemagglutination activity domain protein	6.31e-08	0	0.0113503
ResB-like family	9.49e-06	1.59e-05	0.011383
Agmatine deiminase	0.000106207	9.96e-05	0.0113934
Glutamyl-tRNA synthetase	1.43e-05	1.83e-05	0.011437
bacteriophage n4 adsorption protein b	2e-05	1.7e-05	0.0115276
(twin-arginine translocation) pathway signal	0.000387612	0.000349538	0.0115721
Protein of unknown function (DUF2844)	2.78e-06	5.29e-06	0.0116472
nucleotidase	1.6e-06	7.97e-07	0.0116808
Protein of unknown function (DUF3306)	1.74e-05	2.19e-05	0.0117346
FMN-binding	4.22e-07	7.89e-07	0.011745
inducible periplasmic protein	9.39e-07	2.65e-07	0.0118429
nucleoside hydrolase	7.39e-05	6.74e-05	0.0118532
Phytase	1.84e-05	1.22e-05	0.0119559
Peptidase U32	0.00014507	0.00018418	0.0120558
transporter, permease	6.07e-07	1.08e-06	0.0121321
protein serine_threonine kinase activity	5.14e-07	1.56e-07	0.0121525
cold shock domain family protein	1.1e-07	0	0.012281
Proline-rich protein	7.77e-08	0	0.012389
Glycosyl hydrolases family 28	2.04e-06	5.62e-06	0.0124578
Alanine-rich protein	5.79e-06	8.03e-06	0.012501
Glucosaminyl (N-acetyl) transferase	8.38e-07	1.34e-06	0.0125327
type VI secretion-associated protein	1.88e-05	1.43e-05	0.0125548
SprT	2.05e-06	1.07e-06	0.0125755
tigger transposable element derived	0	6.2e-08	0.012697
helicase domain protein	1.32e-05	9.29e-06	0.0127923
CO dehydrogenase beta subunit acetyl-CoA(...)_842	3.13e-06	2.33e-06	0.0128907
two-component system response regulator	2.09e-07	2.22e-08	0.0129336
Is probably involved in the electron tra(...)_2817	8.06e-05	7.43e-05	0.0130878
Protein of unknown function DUF58	2.07e-05	2.55e-05	0.0131851
Factor ChrR	3.08e-05	3.63e-05	0.0131955
transcriptional regulator, abrb	6.52e-07	1.35e-06	0.0132684
GUN4-like	4.86e-06	3.19e-06	0.0133129
biopolymer transport protein	8.3e-06	5.71e-06	0.0133233
Protein of unknown function (DUF3530)	1.15e-05	1.55e-05	0.0134225
Angiotensin I converting enzyme peptidyl-dipeptidase A	9.95e-05	8.83e-05	0.0134654
Putative methyltransferase	3.44e-06	1.42e-06	0.0135998
PotAssium voltage-gated channel	0.000594625	0.000537156	0.0137499
Protein of unknown function (DUF3494)	4.02e-05	5.64e-05	0.0138499
mobC protein	1.18e-07	0	0.0138944
AmiS UreI transporter	5.01e-07	9.55e-07	0.0139491
Bacterial regulatory proteins, lacI family	4.52e-06	7.88e-06	0.0141378
alkyl hydroperoxide reductase Thiol spec(...)_6716	0.00059215	0.000558399	0.0142451
DnaJ	5.61e-07	1.2e-07	0.0142555
Putative F0F1-ATPase subunit (ATPase_gene1)	8.34e-07	1.3e-06	0.0143305
Uroporphyrinogen III synthase	4.77e-07	7.32e-08	0.0143626
serine threonine protein phosphatase	3.46e-05	2.47e-05	0.0143729
trag family	6.46e-05	5.19e-05	0.0145107
Protein of unknown function (DUF1636)	2.92e-06	1.98e-06	0.014521
Protein of unknown function (DUF2892)	5.01e-05	6.52e-05	0.0145844
Toxic anion resistance	3.26e-05	2.64e-05	0.0146183
ABC transporter, periplasmic protein	5.83e-06	2.28e-06	0.0147515
hemerythrin hhe cation binding domain protein	5.34e-05	6.6e-05	0.0147835
Putative small multi-drug export protein	1.05e-06	7.69e-07	0.0147939
May catalyze the methylation of C-1 in c(...)_3117	1.13e-05	8.9e-06	0.0148275
Conserved hypothetical, protein	0.000129104	0.000115526	0.0149145
Conjugative transposon TraM protein	4.54e-06	6.21e-06	0.0149704
Stress responsive A_B Barrel Domain	7.45e-06	8.91e-06	0.0151683
Pfam:GspL	7.41e-06	1.07e-05	0.0151787
P4Hc	2.37e-06	1.06e-06	0.0153096
Cytochrome c oxidase caa3 assembly factor (Caa3_CtaG)	1.81e-05	1.52e-05	0.015606
TfoX N-terminal domain	4.59e-06	7.24e-06	0.0157226
prevent-host-death family	8.5e-05	7.78e-05	0.0158733
Cytochrome c oxidase subunit II	9.95e-07	2.07e-06	0.0159172
Choline kinase	1.52e-05	1.21e-05	0.0159722
Part of a sulfur-relay system required f(...)_3726	2.04e-05	2.61e-05	0.0159934
Plasma membrane H -transporting two-sector ATPase	2.95e-06	2.05e-06	0.0160037
Ion channel	1.91e-06	8.23e-07	0.016135
Outer membrane protein, MtrB	1.63e-05	2.34e-05	0.0161886
phosphonate metabolism protein PhnM	2.55e-05	2.69e-05	0.0163312
Outer membrane protease	6.24e-08	4.79e-07	0.0163533
s4 domain protein	1.65e-05	2.07e-05	0.0164078
polysaccharide export protein	2.32e-06	3.82e-06	0.0165024
Dihydrolipoyllysine-residue succinyltran(...)_1697	4.84e-07	8.64e-07	0.0165243
phytoene	0.000409201	0.000377146	0.0167494
tectorin alpha	3.7e-06	6.58e-06	0.0167934
conjugal transfer protein, TrbC	1.92e-05	1.16e-05	0.0168038
Tetratricopeptide repeat	2.35e-05	2.73e-05	0.0168354
Phospholipase D endonuclease domain-containing protein	1.88e-06	1.03e-06	0.0169493
glycerol dehydratase	1.68e-05	1.14e-05	0.0169597
S-adenosylmethionine diacylglycerol 3-amino-3-carboxypropyl	2.25e-05	1.79e-05	0.0175302
glyoxylate carboligase	1.87e-05	1.6e-05	0.0176871
ECF sigma factor	3.11e-06	1.44e-06	0.0179097
prolin-rich transmembrane protein	4.24e-06	3.17e-06	0.0179649
iclR family transcriptional regulator	1.02e-07	4.39e-07	0.0179753
sulfite reductase	2.86e-05	3.84e-05	0.0180548
DNA repair protein RadA domain	4.72e-07	7.68e-07	0.018086
toluene tolerance family protein	1.09e-07	2.24e-08	0.0181725
sugar efflux transporter	5.63e-06	7.76e-06	0.0183119
Transglycosylase SLT domain protein	1.37e-07	0	0.0183423
transcription factor jumonji JmjC	8.39e-06	6.52e-06	0.0184067
Pfam:DUF847	2.26e-07	8.35e-07	0.0184371
Protein of unknown function (DUF996)	0	1.67e-07	0.0184687
Hydrogenase, large subunit	4.55e-05	5.87e-05	0.0184891
Synthesis of 3-octaprenyl-4-hydroxybenzoate (By similarity)	0.00029407	0.000279303	0.0185219
Addiction module component, TIGR02574 family	6.8e-06	4.99e-06	0.018554
Excinuclease abc c subunit domain protein	0.00014941	0.000169935	0.0186195
Core-2 I-branching enzyme family protein	6.4e-07	4.27e-08	0.0186737
Binds to Cpn60 in the presence of Mg-ATP(...)_758	2.92e-06	1.37e-06	0.0186957
Family with sequence similarity 82, member B	1.1e-05	1.51e-05	0.0187626
Abortive infection bacteriophage resistance protein	3.25e-06	2.07e-06	0.0188178
Chromatin associated protein KTI12	7.94e-07	9.21e-08	0.0189368
Rossmann fold oxidoreductase	2.52e-06	1.39e-06	0.0189813
Glutamine amidotransferase class-I	1.06e-06	7.37e-07	0.0190143
Protein of unknown function (DUF2878)	4.68e-06	4.16e-06	0.0191692
gene transfer agent (GTA)	3.45e-07	1.24e-07	0.0193079
lysine biosynthesis protein LysW	4.31e-06	2.74e-06	0.0193949
basic membrane	0.00021241	0.000194654	0.0194394
PQQ	6.64e-05	5.19e-05	0.0194497
endoglucanase-related protein	1.93e-06	3.11e-06	0.0194601
Anaerobic ribonucleoside-triphosphate reductase	3.89e-05	4.61e-05	0.0195462
MSHA biogenesis protein MshQ	1.03e-05	1.42e-05	0.0196658
sulfur relay protein TusB DsrH	7.46e-06	1.13e-05	0.0197203
Frataxin-like domain	5.27e-08	2.72e-07	0.0198195
activating enzyme	9.87e-05	0.000111288	0.019863
Protein of unknown function (DUF3349)	1.14e-07	2.78e-07	0.0198837
periplasmic nitrate reductase	3.53e-06	1.94e-06	0.0199158
Ribosomal L25p family	2.22e-07	0	0.0200997
Transposase IS4 Family Protein	1.57e-05	1.19e-05	0.0202065
phage-type endonuclease	8.69e-06	1.24e-05	0.0202368
conserved protein	0.00145418	0.00140323	0.0203189
Tetratricopeptide tpr_2 repeat protein	0.000150957	0.000172007	0.0205143
Type I phosphodiesterase _ nucleotide pyrophosphatase	1.23e-05	1.81e-05	0.0205351
ATPase with chaperone activity ATP-binding subunit	2.31e-05	2.84e-05	0.0205554
isochorismatase hydrolase	1.22e-05	1.55e-05	0.0206452
plasmid partition ParA protein	4.79e-05	4.26e-05	0.0208455
envelope protein	7.7e-06	5.08e-06	0.0209423
Cytidyltransferase-related domain protein	3.34e-06	4.52e-06	0.0211381
electron transfer flavoprotein (alpha	1.79e-07	7.51e-07	0.0212797
FecR protein	8.3e-05	9.41e-05	0.0213122
Removes the formyl group from the N-term(...)_5219	0.000282594	0.000295222	0.0215592
Filamentation induced by cAMP protein fic	0.000138471	0.000119398	0.0217613
Putative zinc ribbon domain	9.27e-06	1.15e-05	0.0218251
LipA A lipoprotein	9.07e-08	0	0.0218454
acid PHOsphatase	8.47e-07	2.32e-07	0.0220152
Pfam:GspK	7.78e-06	1.03e-05	0.0220713
Glycosyl hydrolases family 25	2.85e-07	6.34e-08	0.0221121
Acyl-CoA binding domain containing	1.87e-05	2.16e-05	0.0221325
Acyl transferase domain-containing protein	2.46e-07	5.48e-07	0.0221895
Uncharacterized conserved protein (DUF2278)	5.5e-06	3.02e-06	0.0221999
Ureidoglycolate hydrolase	2.46e-06	1.36e-06	0.0222102
Manganese-dependent inorganic pyrophosphatase	1.3e-05	1.55e-05	0.0222758
integral membrane efflux protein	1.35e-08	1.58e-07	0.0222966
glutamyl-tRNA reductase	5.27e-08	1.62e-07	0.0224608
Catalyzes the oxidative ring opening of (...)_1078	3.11e-05	3.43e-05	0.0227375
Carbon storage	1.41e-06	5.84e-07	0.0227478
Voltage gated chloride channel	1.85e-07	6.49e-07	0.0227683
Protein of unknown function DUF2625	1.45e-06	7.14e-07	0.0228578
Flagellar protein FliS	1.11e-06	2.61e-07	0.0228799
S-layer protein	1.14e-06	7.64e-07	0.0229011
TOBE domain-containing protein	3.57e-06	6.84e-06	0.0229785
phenylacetyl-CoA acceptor oxidoreductase	9.75e-06	1.34e-05	0.0230005
Phosphate-Selective Porin O and P	5.62e-05	4.95e-05	0.0231105
site-specific recombinase, phage integrase family	2.51e-07	0	0.0231209
thioesterase domain-containing protein	1.81e-05	2.24e-05	0.0233144
Protein of unknown function (DUF3365)	2e-05	1.47e-05	0.0233347
Molybdopterin converting factor subunit 1	4.58e-06	6.85e-06	0.0235592
Catalyzes the hydrolysis of N(2)-succiny(...)_1055	2.89e-05	2.17e-05	0.023615
His Kinase A (phospho-acceptor) domain	2.77e-06	1.55e-06	0.023647
Spermidine putrescine ABC transporter, p(...)_5593	8.58e-06	6.74e-06	0.0236922
transporter, RhaT family, DMT superfamily	1.22e-05	1.1e-05	0.0237674
Ni Fe-hydrogenase, b-type cytochrome subunit	8.34e-06	1.32e-05	0.0238899
Protein of unknown function (DUF3240)	3.45e-06	2.02e-06	0.0239331
Metallopeptidase family M24	1.07e-05	7.56e-06	0.0239864
M18 family aminopeptidase	8.59e-06	1.18e-05	0.0239967
The enzymes which catalyze the reversibl(...)_5838	0.000183088	0.000193289	0.0241206
mucin-desulfating sulfatase	4.67e-06	6.87e-06	0.0241731
type 4 fimbrial biogenesis transmembrane protein	1.15e-05	1.54e-05	0.0242168
Domain of unknown function (DUF2088)	7.12e-05	8.02e-05	0.024238
YceI family	5.06e-06	3.13e-06	0.0243494
Chitin binding domain	1.01e-06	1.76e-06	0.0243697
SMP-30 Gluconolaconase LRE domain protein	4.9e-07	2.02e-07	0.0245382
ubiquitin-protein ligase activity	1.35e-07	1.54e-08	0.0246031
Conserved repeat	1.15e-06	1.95e-06	0.0246339
40-residue yvtn family beta-propeller repeat protein	0.000218311	0.000240858	0.0249315
Protein of unknown function (DUF3144)	2.68e-06	5.12e-07	0.0249519
Catalyzes the oxidative cleavage of the (...)_1076	0.000101332	9.59e-05	0.0249622
NosL family	7.77e-08	1.46e-07	0.024994
(l31491) orf2	1.19e-05	8.29e-06	0.0250624
phosphoribosyltransferase	0.000236774	0.000261079	0.0252236
KTI12 homolog, chromatin associated (S. cerevisiae)	1.11e-06	4.5e-07	0.0252448
ASPIC UnbV domain-containing protein	3.13e-06	1.87e-06	0.0253562
Sulfhydryl-activated toxin that causes c(...)_5683	1.33e-06	6.64e-07	0.0254015
Protein of unknown function (DUF3016)	1.06e-05	1.53e-05	0.0254523
Eight transmembrane protein EpsH	3.52e-06	6.95e-06	0.0256473
two-component regulatory protein	5.32e-06	3.79e-06	0.0256781
cobalamin (vitamin B12) biosynthesis CbiG protein	2.34e-05	2.1e-05	0.0257306
expressed protein	5.12e-06	3.63e-06	0.025751
Exhibits S-adenosyl-L-methionine-depende(...)_2014	3.62e-05	4.73e-05	0.0257956
caa(3)-type oxidase subunit IV	1.76e-05	2.21e-05	0.0258511
Amidohydrolase	1.9e-05	2.54e-05	0.0258844
Converts the aldose L-fucose into the co(...)_1379	2.42e-05	2.9e-05	0.0261127
Nitrate reductase	5.18e-05	6.39e-05	0.0261448
Phytanoyl-CoA dioxygenase family protein	0	8.35e-08	0.0262226
L-xylulose 5-phosphate 3-epimerase	8.33e-07	1.73e-06	0.0262554
ACT domain protein	1.5e-05	1.73e-05	0.0262657
apbe family lipoprotein	1.09e-05	9.19e-06	0.0263201
Bacterial Ig-like domain (group 2)	2.12e-07	6.97e-07	0.0263304
zinc finger SWIM domain-containing protein	2.07e-05	1.69e-05	0.0263407
acetone carboxylase, gamma subunit	1.56e-06	1.09e-06	0.0263957
Glycoside Hydrolase Family 43	5.01e-06	3.78e-06	0.026406
Transposase OrfB	8.88e-07	1.76e-06	0.0264815
hrdc domain protein	2.82e-07	4.88e-08	0.0266466
DNA mismatch repair	5.92e-06	3.05e-06	0.026681
Pfam:DUF1185	1.2e-05	1.03e-05	0.0267664
Protein of unknown function (DUF504)	4.42e-06	6.39e-06	0.0267976
Response regulator receiver	5.62e-06	4.07e-06	0.0268197
Helix-turn-helix domain protein	4.42e-05	3.68e-05	0.0268877
coenzyme PQQ synthesis protein B	4.87e-06	2.8e-06	0.026952
Transcriptional Regulator, MerR family	1.01e-05	7.9e-06	0.0270408
WD40-like beta Propeller containing protein	2.41e-07	5.9e-07	0.0273252
Phosphatase	0.000292055	0.000317337	0.0273998
Required for nitrogen fixation. May be p(...)_5244	1.94e-05	2.88e-05	0.0275197
dna polymerase iii delta	9.6e-06	1.32e-05	0.0275624
ThiJ PfpI family protein	5.28e-06	6.78e-06	0.0276598
catalyzes amidations at positions B, D, (...)_6977	5.11e-05	4.39e-05	0.0277137
type VI secretion protein, EvpB VC_A0108 family	5.84e-05	4.81e-05	0.0278463
Protein of unknown function (DUF3443)	4.4e-06	7.75e-06	0.0278775
Blue (Type 1) copper domain protein	0.000150735	0.000177013	0.0278878
deoxyhypusine synthase	0.00017689	0.00016637	0.0279564
s-adenosylmethionine decarboxylase	5.71e-08	2.89e-07	0.0281444
Pfam:IstB	3.48e-07	8.82e-07	0.0282037
phosphosulfolactate synthase activity	2.16e-05	2.68e-05	0.028301
Anti-sigma-factor antagonist	6.95e-06	1.05e-05	0.0283463
Phage protein gp20	4.13e-06	2.53e-06	0.0284025
parb-like partition protein	0.000401675	0.00037458	0.0284769
DsrE family	2.13e-05	2.59e-05	0.0285194
ExbD TolR family protein	2.87e-07	1.19e-06	0.0285929
Protein of unknown function (DUF2961)	4.36e-05	5.01e-05	0.0286456
Pfam:Transposase_35	7.26e-07	4.51e-07	0.0287754
Pfam:DUF2581	5.51e-08	2.71e-07	0.0287857
Sodium calcium exchanger membrane region	6.36e-06	1e-05	0.0288886
Glycoside hydrolase family 20	2.58e-05	3.52e-05	0.0289314
protein family UPF0079, ATPase	0.000181061	0.000188513	0.0291694
SlyX	1.98e-06	3.04e-06	0.0293024
Glutathionylspermidine synthase preATP-grasp	3.52e-06	2.07e-06	0.0293559
WSC domain containing	2.83e-07	8.47e-08	0.0294475
virulence-associated protein E	4.43e-06	2.2e-06	0.0295009
Conjugative transposon TraK protein	4.23e-06	5.56e-06	0.029523
Lantibiotic dehydratase domain protein	1.05e-06	2.32e-06	0.0295883
Predicted periplasmic protein (DUF2271)	5.43e-06	7.89e-06	0.029764
Bacterial extracellular solute-binding protein	1.72e-05	1.38e-05	0.0297743
MSHA biogenesis protein, MshO	8.68e-06	1.21e-05	0.0299264
L,D-transpeptidase catalytic domain	1.63e-05	1.97e-05	0.0299693
AIG2 family	2.36e-05	1.87e-05	0.0300115
BatD protein	2.31e-05	3.09e-05	0.0300343
Antirestriction protein (ArdA)	1.22e-06	2.24e-07	0.0305535
mbth domain-containing protein	1.08e-05	5.34e-06	0.030606
Domain of Unknown Function (DUF928)	2.66e-06	1.69e-06	0.030628
Curli production assembly transport component CsgG	3.22e-05	2.98e-05	0.0306617
Tryptophan halogenase	8.66e-05	6.98e-05	0.0309353
PHP domain	1.21e-05	9.32e-06	0.0309881
OmpA MotB	4.53e-06	6.16e-06	0.031043
DNA replication protein DnaD	3.01e-08	2.81e-07	0.0311179
cytochrome C peroxidase	0.000266065	0.000244301	0.0311388
conjugation trbi family protein	3.9e-05	2.73e-05	0.0311615
helicase-like protein	3.15e-07	1.05e-08	0.0312978
Strawberry notch homolog	2.91e-05	1.96e-05	0.0313734
Orphan protein	3.38e-06	1.69e-06	0.031415
pathway protein C	4.92e-06	7.12e-06	0.0315587
PEP motif anchor domain-containing protein	2.66e-07	8.19e-08	0.0315932
pectinesterase	2.47e-05	3.89e-05	0.0316905
Protein of unknown function (DUF3501)	5.07e-05	5.78e-05	0.0320761
Protein of unknown function (DUF1702)	1.25e-06	4.71e-07	0.0320865
UPF0309 protein	3.4e-05	3.79e-05	0.0323161
HhH1	4.46e-06	2.42e-06	0.032402
TfoX domain protein	2.27e-07	0	0.0324228
Ferrichrome-binding protein	1.96e-07	0	0.0324799
transcriptional regulator, LuxR family	9.59e-06	7.82e-06	0.0326817
Domain of unknown function DUF87	5.95e-05	5.14e-05	0.0327464
Sarcosine oxidase, gamma subunit	1.34e-05	9.68e-06	0.0328352
Glycerophosphoryl diester phosphodiesterase family	2.42e-07	4.33e-07	0.0329537
Lipase (EC	3.17e-08	9.66e-08	0.0330682
Sugar (and other) transporter	1.29e-05	1.16e-05	0.0330994
Bacterial regulatory helix-turn-helix proteins, AraC family	4.46e-06	2.92e-06	0.0331421
tryptophanase EC 4.1.99.1	8.05e-05	9.65e-05	0.0332284
Domain of unknown function (DUF2935)	1.05e-06	1.53e-06	0.0332598
nonribosomal peptide	2.28e-05	1.12e-05	0.0333164
nitrate reductase, gamma subunit	6.93e-05	8.84e-05	0.0333586
Aminoglycoside_hydroxyurea antibiotic resistance kinase	1.3e-06	3.19e-06	0.033369
Lipolytic protein G-D-S-L family	9.03e-06	6.35e-06	0.0334211
DNA polymerase beta domain protein region	8.83e-05	7.99e-05	0.0334737
relaxase Mobilization Nuclease family protein	2.79e-06	1.56e-06	0.0335706
methyltransferase type 12	5.29e-05	6.04e-05	0.0336838
Major facilitator superfamily MFS_1	0.00023591	0.000256212	0.0339846
lysine biosynthesis protein	3.23e-06	2.4e-06	0.0340521
glycoside hydrolase family 4	9.62e-05	8.85e-05	0.0341097
Molybdopterin	0.000161978	0.000157755	0.0343628
Protein of unknown function (DUF3373)	2.06e-06	3.81e-06	0.0344312
metallo-sulfur cluster assembly	0.00012694	0.000137272	0.034539
arginine	3.2e-05	2.56e-05	0.0345493
YfdX protein	1.06e-06	3.6e-07	0.0345714
arsenical-resistance protein	0.00014893	0.000170433	0.0346391
endoribonuclease L-PSP	4.87e-05	5.19e-05	0.0346594
vegetatible incompatibility protein	1.91e-05	1.51e-05	0.0347131
2-hydroxyglutaryl-CoA dehydratase	8.7e-05	0.000129746	0.035071
(signal peptide) protein	2.79e-06	2.01e-06	0.0350913
Required to facilitate the formation of (...)_5253	0.000210839	0.000221822	0.0351793
Protein of unknown function (DUF3301)	2.3e-05	2.77e-05	0.0352471
Bacterial RNA polymerase, alpha chain C terminal domain	2.12e-06	8.69e-07	0.0354985
decarboxylase beta subunit	1.27e-05	1.69e-05	0.0355309
Plant lipoxygenase may be involved in a (...)_4175	1.88e-06	6.73e-07	0.0355939
Transfers the N-acyl diglyceride group o(...)_6022	0.000218809	0.000227113	0.0356151
chemotaxis protein	1.42e-05	1.71e-05	0.0356962
type III secretion apparatus protein	2.69e-07	5.34e-07	0.0358198
malonate transporter, MadL subunit	1.75e-06	9.64e-07	0.0359059
Hepn domain-containing protein	3.5e-07	5.01e-08	0.0360251
cold-shock DNA-binding domain protein	7.93e-05	8.93e-05	0.0360869
Type II secretion system protein K	6.37e-07	4.44e-07	0.0361544
Pyrimidine reductase, riboflavin biosynthesis, RibD	1.15e-06	4.18e-07	0.0362096
membrane protein involved in aromatic hy(...)_8084	7.61e-06	1.06e-05	0.03622
Prokaryotic diacylglycerol kinase	1.5e-06	2.55e-07	0.0363203
In the first step of glycine, betaine an(...)_2711	3.99e-07	1.04e-06	0.0363749
IcmD (DotP)	3.88e-06	1.13e-06	0.0363961
synthase	0.00187344	0.00171524	0.0364189
Catalyzes the 2_-O-methylation at nucleo(...)_961	2.25e-05	2.54e-05	0.0365303
Transferase	0.000294633	0.000300817	0.0365511
Nucleotidyl transferase	7.45e-06	1.02e-05	0.036778
repeat-containing protein	0.000734638	0.000789858	0.0368001
Ricin b lectin	2.79e-06	4.76e-06	0.0368731
beta-galactosidase	0.000105374	0.000126245	0.0368834
amino acid aminotransferase	1.73e-05	1.35e-05	0.0369037
carboxylesterase (ec 3.1.1.1)	2.19e-05	2.8e-05	0.0369265
light-independent bacteriochlorophyll biosynthetic process	3.79e-07	5.91e-08	0.0369825
Peptidase family S41	9.62e-06	7.45e-06	0.0370828
protein with protein kinase and helix-ha(...)_8773	5.22e-06	2.67e-06	0.0371567
Glycosyl hydrolase family 26	5.37e-08	2.69e-07	0.0372112
nickel-dependent hydrogenase large subunit	4.75e-05	6.25e-05	0.0372548
PBS lyase HEAT repeat-like domain protein	3.03e-07	5.81e-07	0.0373817
Protein of unknown function (DUF466)	3.89e-06	2.78e-06	0.0376445
Family of unknown function (DUF500)	6.68e-06	8.42e-06	0.0377206
Water Stress and Hypersensitive response domain protein	1.19e-06	2.3e-06	0.0378274
domain protein	0.00253345	0.00258659	0.0378813
YopX protein	3.68e-07	1.38e-06	0.0379358
Trimethylamine methyltransferase	9e-05	7.27e-05	0.0380556
Required for meiotic nuclear division 1 (...)_5243	1.65e-05	2.12e-05	0.0380659
2,5 RNA ligase	3.45e-08	1.42e-07	0.0381198
iron-regulated protein a	1.59e-06	6.53e-07	0.0382105
TRAP dicarboxylate transporter DctQ subunit	2.04e-06	1.35e-06	0.0383639
lipopolysaccharide kinase	1.23e-06	5.87e-07	0.0384273
chaperone-mediated protein complex assembly	2.79e-05	3.22e-05	0.0384594
periplasmic	1.46e-05	1.06e-05	0.0385359
type IIi	3.82e-05	3.1e-05	0.0385697
(Anaerobic) ribonucleoside-triphosphate (...)_6	6.18e-08	2.75e-07	0.038621
GPR1 FUN34 yaaH family protein	2.35e-06	1.37e-06	0.0387832
lipase, Class 3	2.27e-06	3.28e-06	0.0391008
protein with conserved CXXC pairs	1.34e-06	7.74e-07	0.0391228
indoleamine 2,3-dioxygenase	1.43e-05	8.79e-06	0.0391665
metal cation transporter	2.62e-05	2.03e-05	0.0392089
Cell Surface	1.66e-07	2.09e-07	0.039374
#NAME?	0.000620014	0.000605032	0.039592
Proline-rich region	9.46e-06	1.34e-05	0.0396793
filamentation induced by cAMP protein Fic	1.99e-07	7.99e-07	0.0396896
Bacterial protein of unknown function (DUF925)	1.39e-05	1.09e-05	0.0397744
integrase domain protein SAM domain protein	1.05e-05	7.33e-06	0.039841
methylaspartate ammonia-lyase	1.11e-06	7.08e-07	0.0398513
Ribonucleoside-triphosphate reductase	4.56e-06	7.57e-06	0.0399151
methylenetetrahydrofolate dehydrogenase (NADP( ))	6.57e-06	4.88e-06	0.0399254
TRAP transporter, transmembrane protein	4.42e-06	3.34e-06	0.040029
Protein of unknown function (DUF1588)	6.6e-06	2.24e-06	0.0400393
integral membrane transport protein	1.49e-07	3.47e-08	0.0400605
nitrate reductase beta subunit	0.000171782	0.000193532	0.040162
Seems to be involved in the anchoring of(...)_5471	1.94e-05	2.9e-05	0.0402492
transfer protein, trbG	3.19e-05	2.05e-05	0.040324
Feruloyl esterase	0.000131377	0.000118604	0.0403344
integrin-like protein	6.3e-07	2.26e-07	0.040488
Regulator of chromosome condensation (RCC1) repeat	6.29e-08	2.62e-07	0.040532
Protein of unknown function (DUF1054)	8.67e-08	1.48e-08	0.0405871
LacI family Transcriptional regulator	8.64e-06	1.32e-05	0.0406312
triacylglycerol lipase EC 3.1.1.3	1.17e-07	4.09e-07	0.0407321
Anaerobic C4-dicarboxylate transporter	3.94e-06	6.55e-06	0.0408087
Bacterial aa3 type cytochrome c oxidase subunit IV	4.85e-06	1.79e-06	0.0409314
Protein of unknown function, DUF606	2.55e-06	1.25e-06	0.0409831
Protein of unknown function (DUF3309)	2.23e-05	2.74e-05	0.0410518
hydroxylamine oxidase	1.2e-05	1.03e-05	0.0411079
Large subunit of N-N-dimethylformamidase	1.49e-05	1.13e-05	0.04114
Protein of unknown function (DUF1266)	2.31e-08	1.67e-07	0.0411627
thioredoxin reductase	0.000713827	0.00069444	0.0412495
G8 domain	2.63e-06	1.49e-06	0.0412599
Cyd operon protein YbgT	3.2e-07	1.07e-06	0.0413016
periplasmic binding protein	1.81e-05	1.56e-05	0.0413991
POLIIIAc	3.04e-07	9.97e-08	0.0414318
CRISPR-associated protein Cse3 family	1.62e-07	4.85e-07	0.0416265
excinuclease, ATPase subunit	1.29e-06	2.11e-06	0.0416792
Tripartite ATP-independent periplasmic transporter, DctQ	2.69e-05	3.12e-05	0.0416895
aryLSUlfotransferase	7.87e-07	1.48e-06	0.0417984
molybdate ion transmembrane transporter activity	9.39e-06	1.51e-05	0.0418087
Virulence factor Mce family protein	2.28e-06	4.87e-06	0.0418407
Zinc finger SWIM domain protein	1.04e-05	7.3e-06	0.0418634
Positively regulates the activity of the(...)_4235	6.59e-05	5.62e-05	0.0419899
permease YjgP YjgQ family protein	2.46e-06	1.36e-06	0.0421361
C4-dicarboxylate transporter malic acid transport protein	5.48e-05	6.85e-05	0.0421582
cobaltochelatase, cobn subunit	6.86e-05	5.76e-05	0.0423733
Poly (ADP-ribose) glycohydrolase (PARG)	5.33e-07	3.16e-07	0.0424167
Periplasmic binding protein LacI transcriptional regulator	0.000276255	0.000264855	0.0426217
peptidase c39, bacteriocin processing	1.17e-05	8.82e-06	0.042632
Porin Gram-negative type	1.08e-06	2.66e-06	0.0426849
dopa 4,5-dioxygenase	1.15e-05	1.32e-05	0.0427507
Glycosyltransferase family 10 (fucosyltransferase)	1.09e-06	1.89e-06	0.0428476
The glycine cleavage system catalyzes th(...)_5841	0.000540409	0.000487925	0.0430594
RNA polymerase sigma-70 factor, ECF subfamily	0	1.19e-07	0.0431275
fmn-binding protein	3.84e-06	6.24e-06	0.043256
Cytochrome b562	6.61e-07	1.03e-06	0.0433096
transcriptional regulator MERR family	4.14e-06	5.92e-06	0.0433951
PKHD-type hydroxylase	5.94e-05	5.01e-05	0.043428
cobalt transporter, subunit CbtA	1.22e-05	8.74e-06	0.04345
Adenylate Guanylate cyclase	2.05e-05	2.37e-05	0.0434951
Type II DNA modification methyltransferase	2.53e-07	8.09e-08	0.0435054
MucD-putative a secreted serine proteinase	3.44e-06	4.78e-06	0.0435816
cytochrome C assembly protein	4.55e-05	5.23e-05	0.0436132
pilL protein	1.01e-07	2.65e-07	0.0436814
GtrA-like protein	2.31e-05	1.99e-05	0.0438558
protease inhibitor	9.11e-07	1.35e-06	0.0439618
phosphocarrier protein (HPr)	0.000135698	0.000143493	0.0439721
Domain of Unknown Function (DUF1543)	2.02e-06	1.22e-06	0.0441742
Pectinolytic enzymes consist of four cla(...)_3764	6.15e-08	3.39e-07	0.0441962
frv operon regulatory protein	4.8e-06	5.47e-06	0.0444879
ABC permidine putrescine transporter, inner membrane subunit	6.64e-06	4.62e-06	0.0445328
heavy chain	1.63e-06	1.46e-07	0.0446905
Uncharacterized ACR, COG1993	4.4e-05	5.68e-05	0.0449754
Urea carboxylase-associated protein	6.42e-05	5.67e-05	0.0450183
cereblon	1.34e-06	1e-06	0.0450874
Type IV secretion-system coupling protein DNA-binding domain	2.12e-06	1.04e-06	0.0451985
Two component LuxR family transcriptional regulator	4.06e-08	2.37e-07	0.0452974
TetR-family transcriptional regulator	9.39e-07	2.74e-07	0.0453195
Histone deacetylase	0.000293989	0.000271928	0.0453423
5-carboxymethyl-2-hydroxymuconate	1.44e-05	1.53e-05	0.045404
Uncharacterized conserved protein (DUF2164)	1.88e-05	1.54e-05	0.0454143
sterol desaturase family protein	4.86e-06	2.98e-06	0.0454698
badM Rrf2 family transcriptional regulator	1.18e-05	1.66e-05	0.0455454
pyrophosphorylase	1.56e-05	1.88e-05	0.0455883
cytochrome C oxidase	0.000221036	0.00024677	0.0456563
SARP family transcriptional regulator	2.96e-06	1.62e-06	0.0456993
F0F1-ATPase subunit	3.73e-06	5.34e-06	0.0457096
Glycosyltransferase sugar-binding region(...)_2459	1.1e-06	1.86e-06	0.0457299
General (non sugar-specific) component o(...)_2317	0.000186676	0.000196129	0.0457831
lipase class 2	3.58e-06	1.67e-06	0.0458566
Part of the ABC transporter complex PotA(...)_3734	0.000729182	0.000692438	0.046097
Kelch motif	4.96e-07	9.12e-07	0.0461198
glycosyl transferase, family 8	1.99e-06	6.44e-07	0.0461301
ATP-dependent old family endonuclease	4.66e-07	1.5e-06	0.0461829
Outer membrane protein family (DUF1597)	1.05e-05	6.7e-06	0.0462457
Pap2 superfamily protein	2.96e-06	3.45e-06	0.0463798
Protein of unknown function (DUF2785)	6.69e-06	4.15e-06	0.0465053
Nitrile hydratase, alpha chain	2.89e-06	1.38e-06	0.0466612
PEGA domain-containing protein	6.84e-07	1.25e-06	0.0467601
peroxisomal biogenesis factor	0	2.52e-07	0.0468271
pilus assembly	7.73e-06	3.63e-06	0.0468901
tpr domain protein	3.68e-05	4.08e-05	0.0469005
ApbE family	2.56e-06	1.38e-06	0.0469217
AraC Family	2.38e-07	9.63e-07	0.0469421
sulfuric ester hydrolase activity	2.34e-05	1.94e-05	0.0470427
Thioesterase	0.000398283	0.000411738	0.0470531
F-box protein 21	8.12e-05	9.02e-05	0.0471083
Flagellar basal-body protein flbY	3.03e-06	9.46e-07	0.0471187
Thiamine biosynthesis protein thiS	5.89e-05	6.31e-05	0.0471948
Protein of unknown function (DUF2793)	2.05e-05	1.78e-05	0.0472465
Polysaccharide biosynthesis_export protein	4.09e-06	2.35e-06	0.0473311
sulfur oxidation protein SoxZ	4.47e-05	5.36e-05	0.0474254
Interacts with CbpA and inhibits both th(...)_2749	7.71e-07	1.87e-07	0.0476341
Peptidase M15 family protein	4.87e-06	3.9e-06	0.0476549
non-ribosomal peptide synthetase	0.00173407	0.000835571	0.0477821
Conserved TM helix repeat-containing protein	1.17e-05	8.59e-06	0.047838
methane monooxygenase ammonia monooxygenase subunit A	3.82e-06	2.4e-06	0.047949
Alpha amylase	1.86e-06	2.88e-06	0.0479593
Potassium inwardly-rectifying channel, subfamily J, member	2.12e-05	2.84e-05	0.0479797
fxsa cytoplasmic membrane protein	2.02e-05	2.33e-05	0.0480476
C_GCAxxG_C_C family	1.96e-06	2.94e-06	0.0480779
type IV pilus biogenesis protein	4.21e-06	8.7e-06	0.0481
Protein of unknown function (DUF1549)	0.000441012	0.000368258	0.0481877
synthetase	0.000149368	0.000125821	0.048291
lipopolysaccharide biosynthesis protein	8.39e-06	7.37e-06	0.0484864
organization protein	3.21e-05	2.69e-05	0.0487173
nucleoside kinase, CMP and AMP kinase	9.46e-07	5.87e-07	0.048749
metalloenzyme domain protein	9.64e-06	7.15e-06	0.0488762
YeeE YedE family protein	0.000200851	0.000214197	0.0489211
Membrane transport protein	1.73e-06	1.11e-06	0.0489419
NIL domain	9.45e-06	7.54e-06	0.0489985
Salt-stress induced outer membrane protein	6.86e-07	2.47e-07	0.0491403
Protein of unknown function (DUF3553)	2.66e-06	1.82e-06	0.0492381
6-phosphogluconate dehydrogenase	0.000145369	0.000167672	0.049279
One of the primary rRNA binding proteins(...)_3555	0.000259705	0.000251359	0.0493336
ETC complex I subunit conserved region	3.6e-06	2.69e-06	0.0493557
Domain of unknown function (DUF389)	4.68e-07	2.01e-07	0.049366
isoprenylcysteine carboxyl methyltransferase	0.000236256	0.000246955	0.0495757
Dehydratase, small subunit	3.96e-06	2.68e-06	0.049586
Exopolysaccharide synthesis	3.55e-05	3.15e-05	0.049618
PIWI domain protein	7.36e-06	4.19e-06	0.0496826
small subunit	3.13e-05	3.89e-05	0.0498371
uba thif-type nad fad binding protein	2.98e-05	3.56e-05	0.0499374
